# Supplementary material for: Interfacing nickel nitride and nickel boosts both electrocatalytic hydrogen evolution and oxidation reactions
Source: PubMed Central journal article supplement (PMC6208398; doi:10.1038/s41467-018-06728-7), 2018-10-31
Supplement: 41467_2018_6728_MOESM1_ESM.pdf [file 41467_2018_6728_MOESM1_ESM.pdf]

## Supplementary Information

### **Interfacing nickel nitride and nickel boosts both electrocatalytic hydrogen evolution and oxidation reactions**

Fuzhan Song,<sup>1+</sup> Wei Li,<sup>1+</sup> Jiaqi Yang,<sup>2</sup> Guanqun Han,<sup>1</sup> Peilin Liao,<sup>2\*</sup> Yujie Sun<sup>1,3\*</sup>

<sup>1</sup>Department of Chemistry & Biochemistry, Utah State University, Logan, UT 84322, United States

<sup>2</sup>School of Materials Engineering, Purdue University, West Lafayette, IN 47907, United States

<sup>3</sup>Department of Chemistry, University of Cincinnati, Cincinnati, OH 45221, United States

<sup>+</sup>These authors contributed equally: Fuzhan Song and Wei Li.

Correspondence and requests for materials should be addressed to Yujie Sun (email: yujie.sun@uc.edu) or Peilin Liao (email: lpl@purdue.edu).

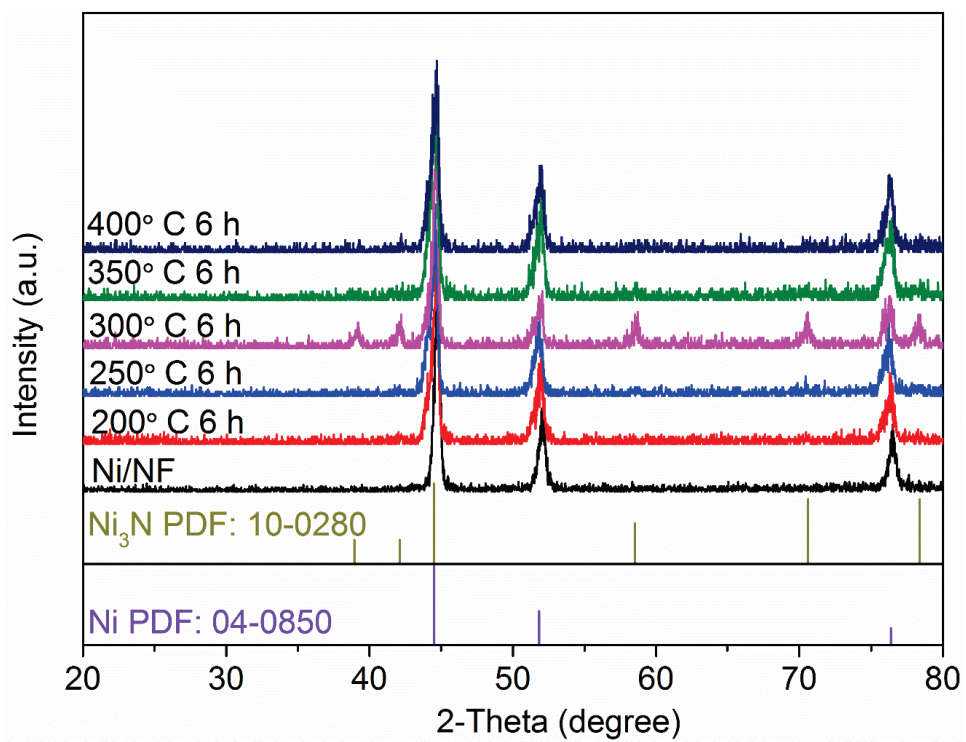

**Supplementary Fig. 1.** XRD patterns of  $\text{Ni}_3\text{N}/\text{Ni}/\text{NF}$  synthesized at different nitridation temperatures for 6 h.

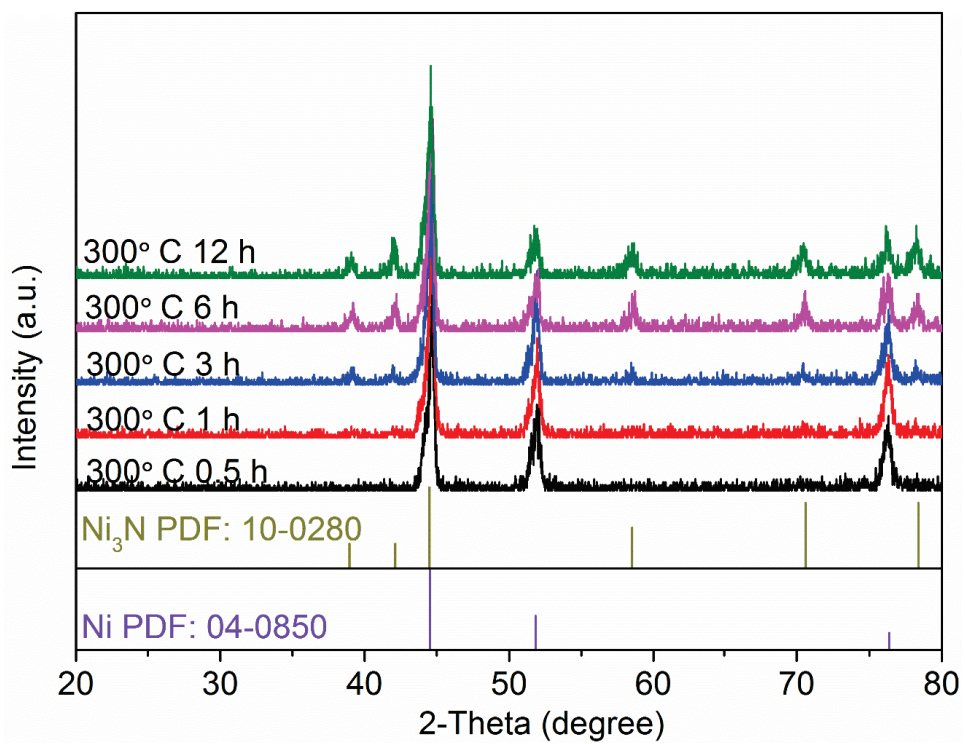

**Supplementary Fig. 2.** XRD patterns of  $\text{Ni}_3\text{N}/\text{Ni}/\text{NF}$  synthesized at  $300^\circ\text{C}$  for different duration.

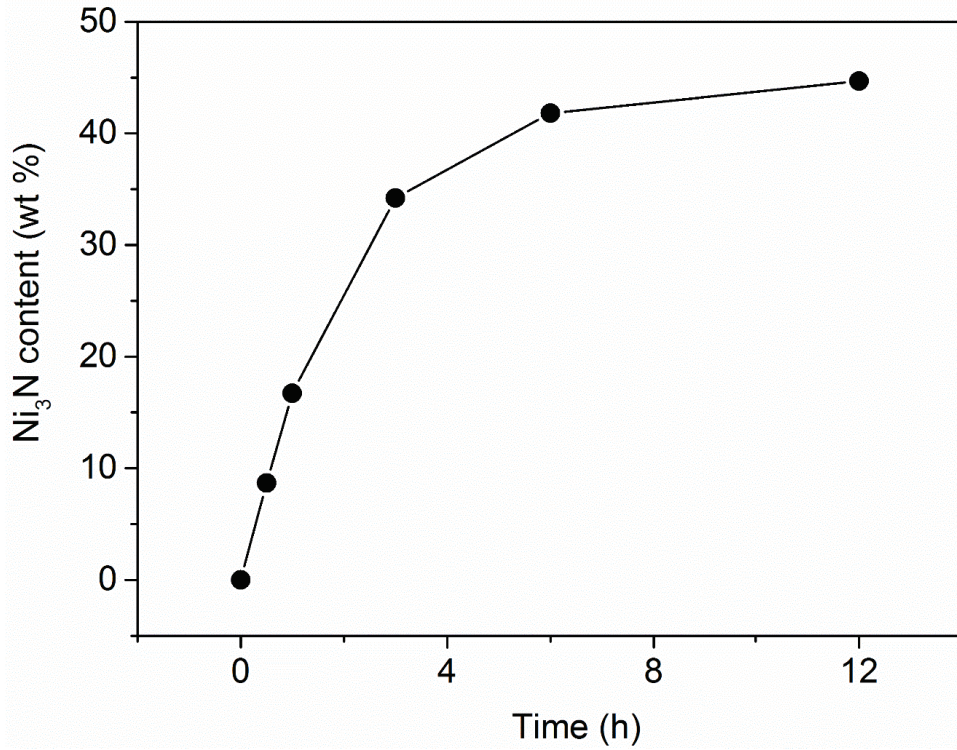

**Supplementary Fig. 3.** The weight percent of Ni<sub>3</sub>N in Ni<sub>3</sub>N/Ni/NF subjected to NH<sub>3</sub> treatment at 300 °C for different times.

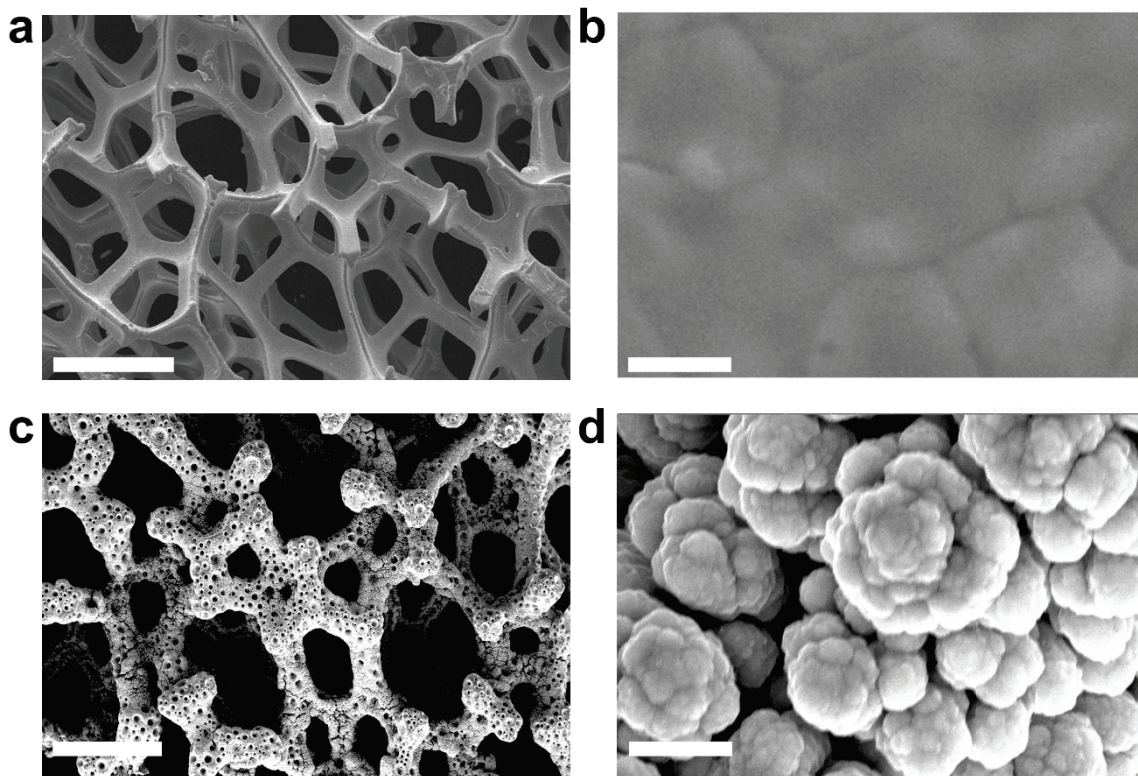

**Supplementary Fig. 4. SEM characterization of NF and Ni/NF. a-b** SEM images of bare NF and **c-d** electrodeposited Ni/NF. Scale bars, 500  $\mu\text{m}$  **a, c**; 2  $\mu\text{m}$  **b, d**.

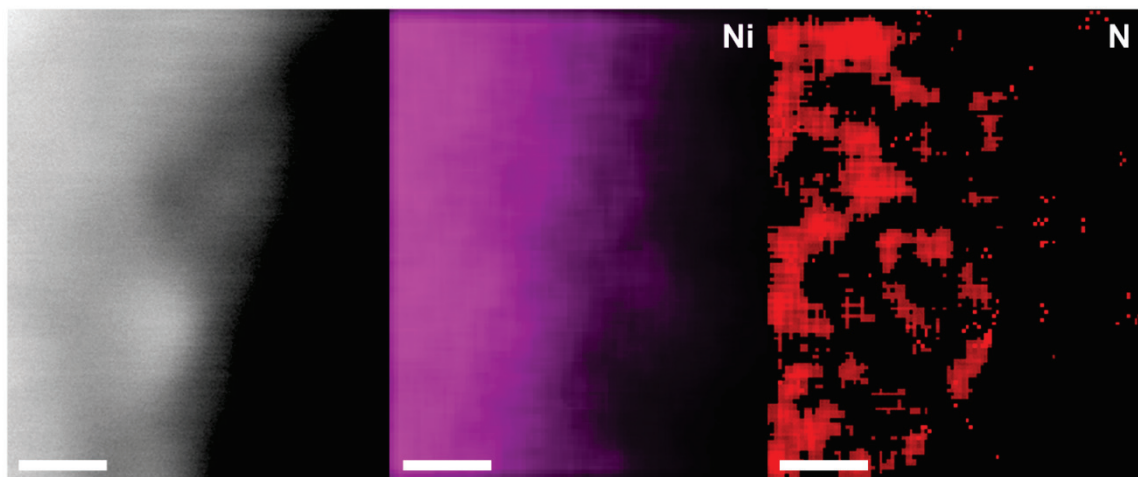

**Supplementary Fig. 5. TEM and EDX mapping characterization.** High-angle annular dark-field scanning transmission electron microscopy (HAADF-STEM) image and corresponding elemental maps of Ni and N in the  $\text{Ni}_3\text{N}/\text{Ni}$  interfacial electrocatalyst. Scale bar, 2.5 nm.

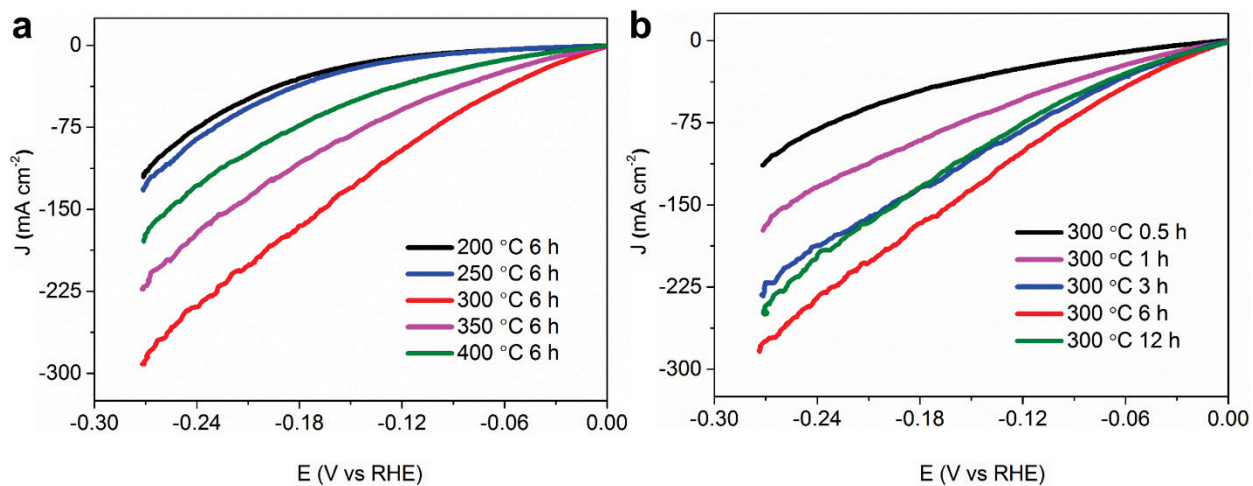

**Supplementary Fig. 6. HER performance of Ni<sub>3</sub>N/Ni/NF synthesized at different temperatures and times under neutral conditions.** Linear sweep voltammetry (LSV) curves of Ni<sub>3</sub>N/Ni/NF synthesized **a** at different nitridation temperature for 6 h and **b** at 300 °C for different duration. The LSV curves were collected in H<sub>2</sub>-saturated 1.0 M potassium phosphate (KPi) buffer at a scan rate of 5 mV s<sup>-1</sup>.

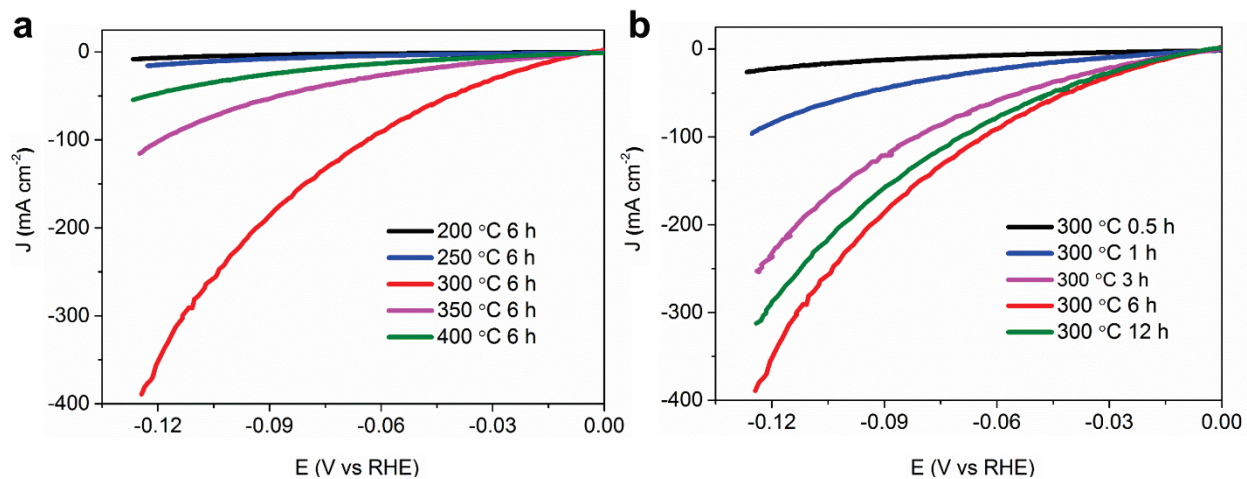

**Supplementary Fig. 7. HER performance of  $\text{Ni}_3\text{N}/\text{Ni}/\text{NF}$  synthesized at different temperatures and times under alkaline conditions.** Linear sweep voltammetry (LSV) curves of  $\text{Ni}_3\text{N}/\text{Ni}/\text{NF}$  synthesized **a** at different nitridation temperature for 6 h and **b** at 300 °C for different duration. The LSV curves were collected in  $\text{H}_2$ -saturated 1.0 M KOH at a scan rate of  $5 \text{ mV s}^{-1}$ .



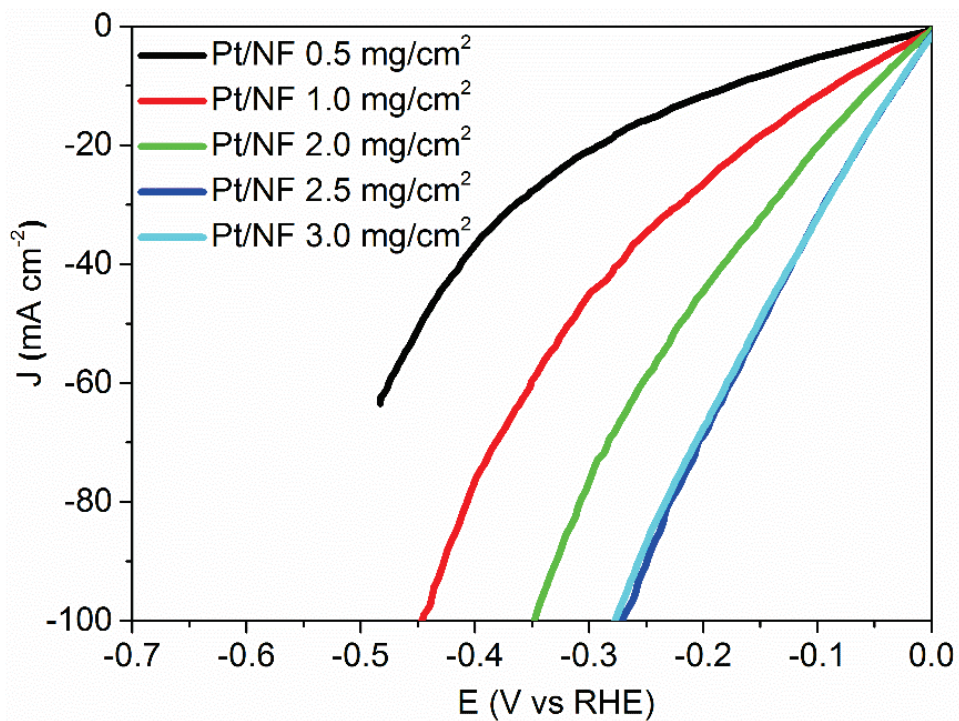

**Supplementary Fig. 8. HER performance of Pt/C loaded on NF under neutral conditions.** Linear sweep voltammetry curves of Pt/NF with different mass loadings of Pt/C for HER measured in H<sub>2</sub>-saturated 1.0 M KPi.

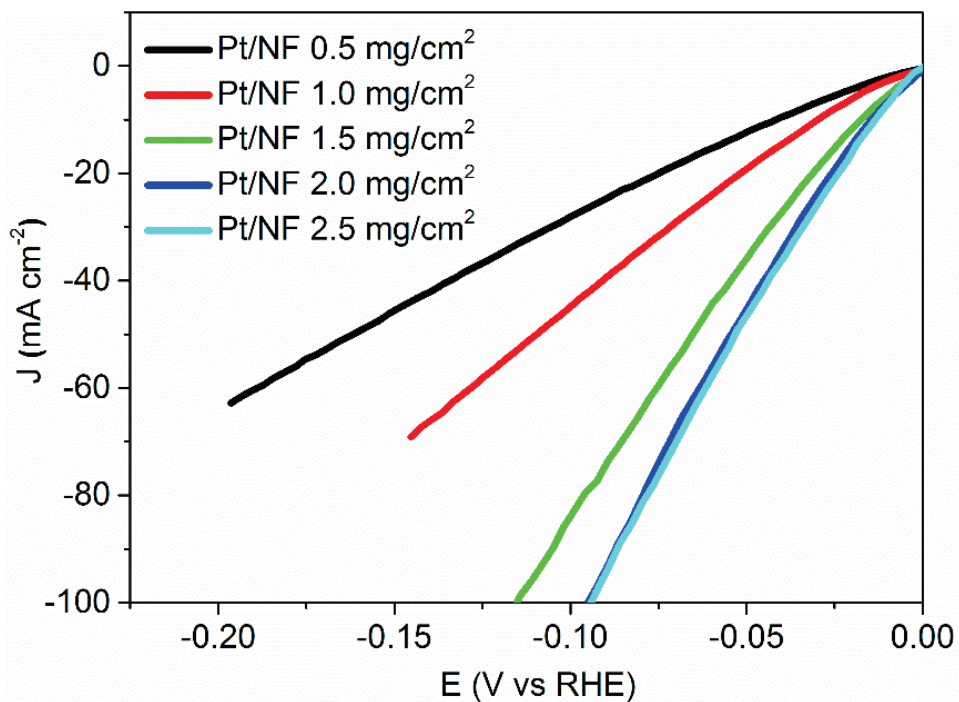

**Supplementary Fig. 9. HER performance of Pt/C loaded on NF under alkaline conditions.** Linear sweep voltammetry curves of Pt/NF with different mass loadings of Pt/C for HER in H<sub>2</sub>-saturated 1.0 M KOH.

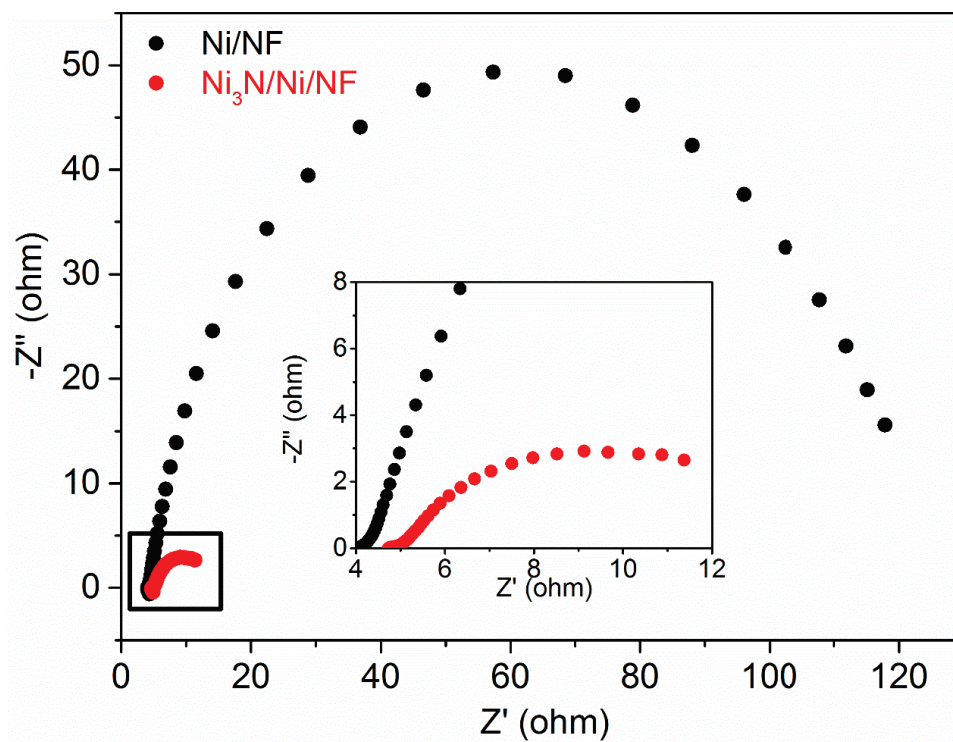

**Supplementary Fig. 10. Electrochemical impedance spectroscopy (EIS) measurements under neutral conditions.** Nyquist plots of Ni<sub>3</sub>N/Ni/NF and Ni/NF measured at -0.066 V vs RHE in 1.0 M KPi buffer.

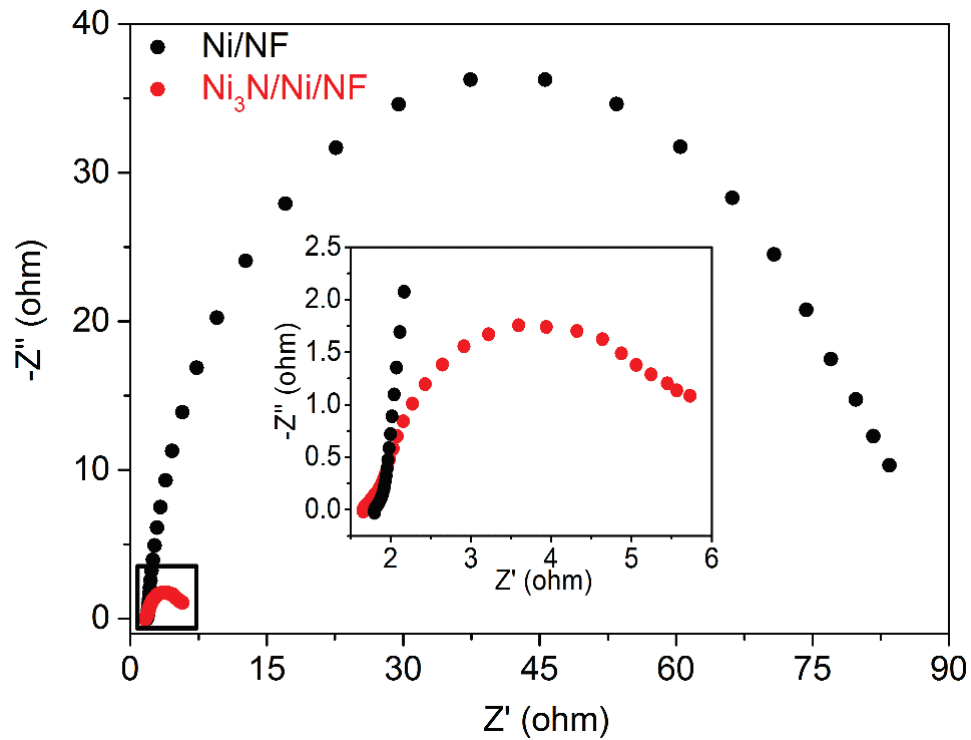

**Supplementary Fig. 11. Electrochemical impedance spectroscopy (EIS) measurements under alkaline conditions.** Nyquist plots of Ni<sub>3</sub>N/Ni/NF and Ni/NF measured at -0.127 V vs RHE in 1.0 M KOH.

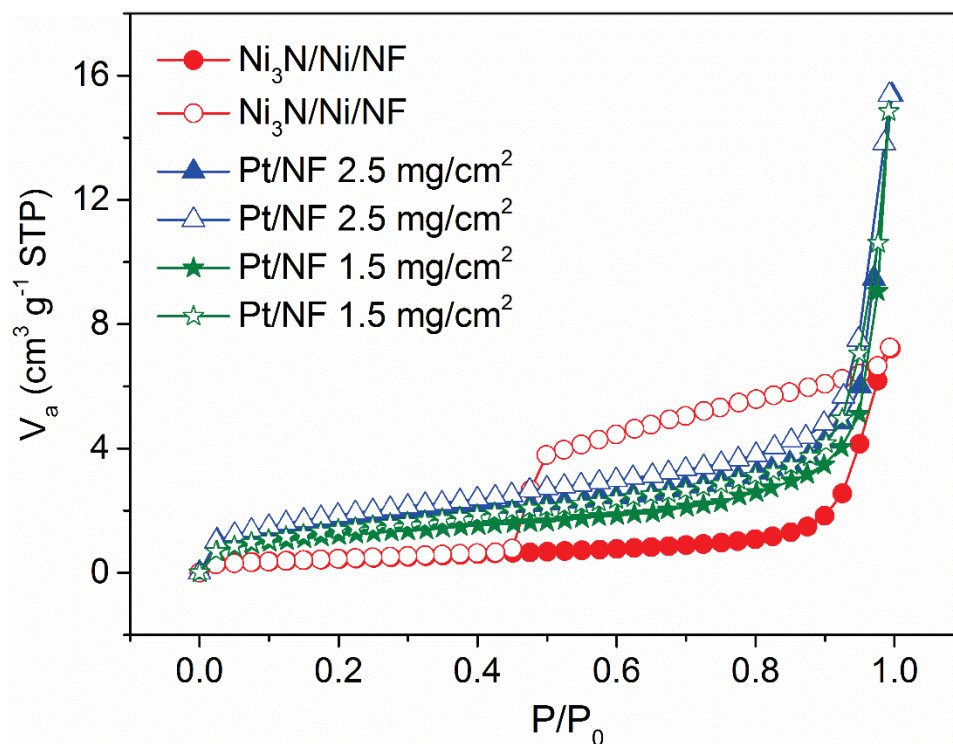

**Supplementary Fig. 12. Brunauer-Emmett-Teller (BET) surface area measurements.**  $\text{N}_2$  adsorption-desorption isotherms of  $\text{Ni}_3\text{N}/\text{Ni}/\text{NF}$ ,  $\text{Pt}/\text{NF}$  ( $1.5 \text{ mg cm}^{-2}$ ) and  $\text{Pt}/\text{NF}$  ( $2.5 \text{ mg cm}^{-2}$ ).

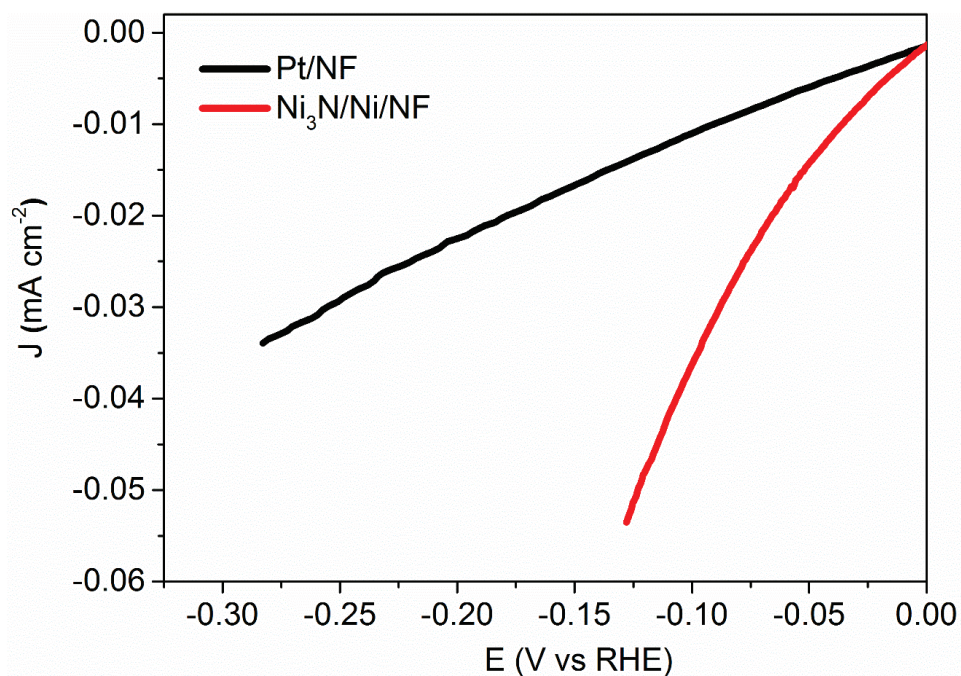

**Supplementary Fig. 13. Comparison of intrinsic specific activities for HER under neutral conditions.** The Brunauer-Emmett-Teller (BET) surface area-normalized linear sweep voltammetry curves of optimized Pt/NF (2.5 mg cm<sup>-2</sup>) and Ni<sub>3</sub>N/Ni/NF for HER in H<sub>2</sub>-saturated 1.0 M KPi.

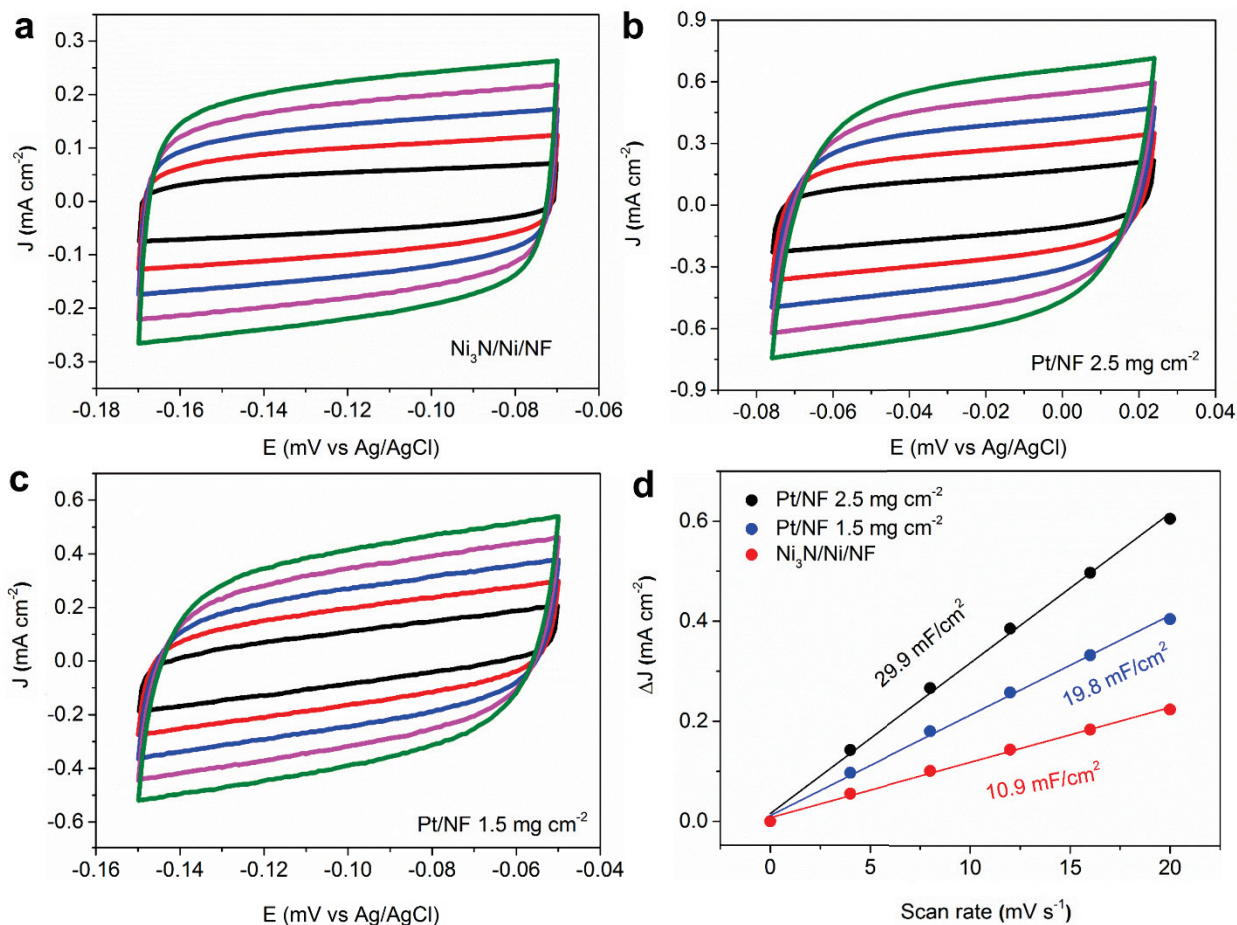

**Supplementary Fig. 14. Electrochemically active surface area (ECSA) measurements.** CV curves of **a**  $\text{Ni}_3\text{N}/\text{Ni}/\text{NF}$ , **b**  $\text{Pt}/\text{NF}$  ( $2.5 \text{ mg/cm}^2$ ), and **c**  $\text{Pt}/\text{NF}$  ( $1.5 \text{ mg/cm}^2$ ) collected at various scan rates ranging from 4 to  $20 \text{ mV s}^{-1}$  in  $\text{CH}_3\text{CN}$  with  $0.15 \text{ M KPF}_6$ . **d** The linear fitting of scan rate versus  $\Delta J$  (the difference between the anodic and cathodic current densities at open circuit potential).

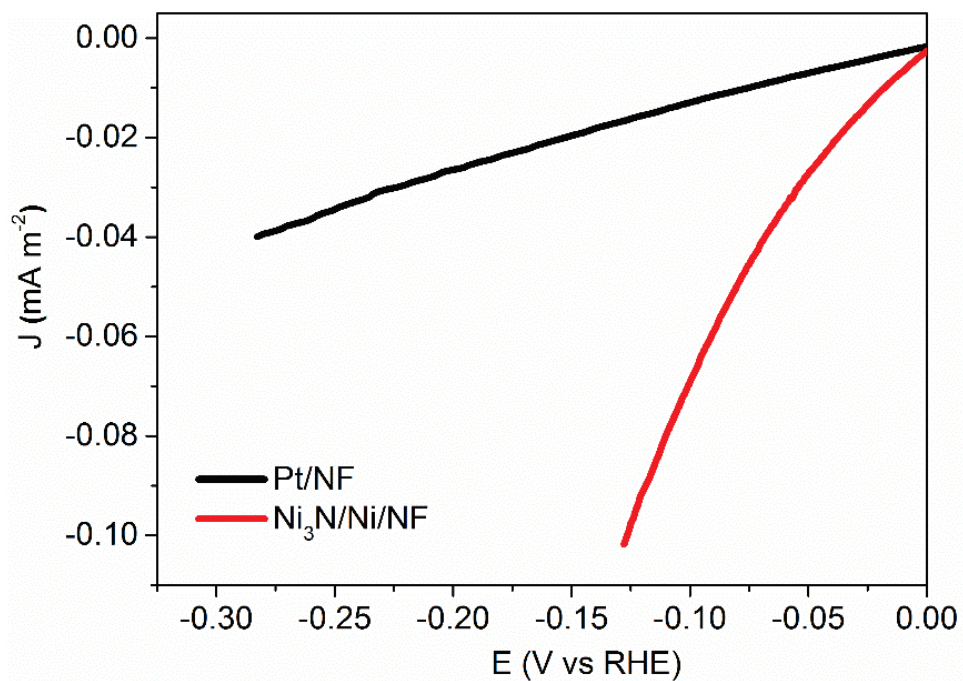

**Supplementary Fig. 15. Comparison of intrinsic specific activities for HER under neutral conditions.** The ECSA-normalized linear sweep voltammetry curves of optimized Pt/NF (2.5  $\text{mg/cm}^2$ ) and  $\text{Ni}_3\text{N/Ni/NF}$  for HER in  $\text{H}_2$ -saturated 1.0 M KPi.



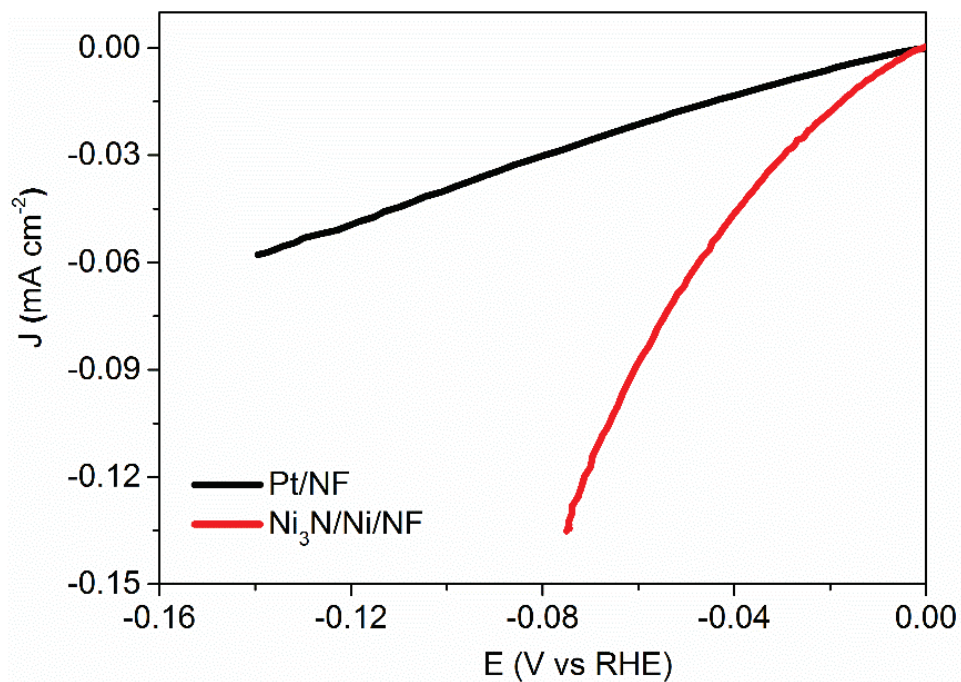

**Supplementary Fig. 16. Comparison of intrinsic specific activities for HER under alkaline conditions.** The ECSA-normalized linear sweep voltammetry curves of optimized Pt/NF (2.5  $\text{mg/cm}^2$ ) and Ni<sub>3</sub>N/Ni/NF for HER in H<sub>2</sub>-saturated 1.0 M KOH.

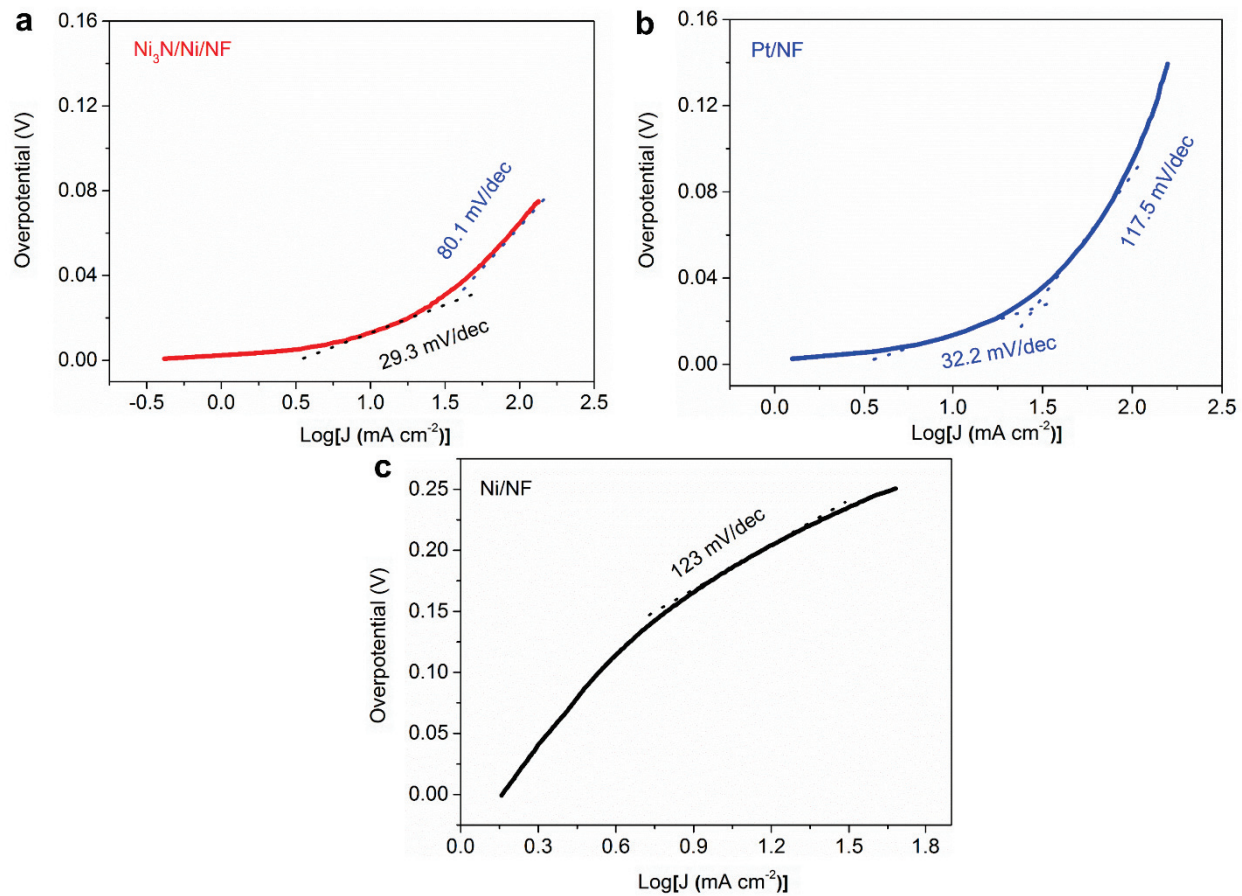

**Supplementary Fig. 17. HER kinetics under alkaline conditions.** Tafel plots of **a**  $\text{Ni}_3\text{N}/\text{Ni}/\text{NF}$ , **b** Pt/NF, and **c** Ni/NF with their linear fittings for HER in 1.0 M KOH.

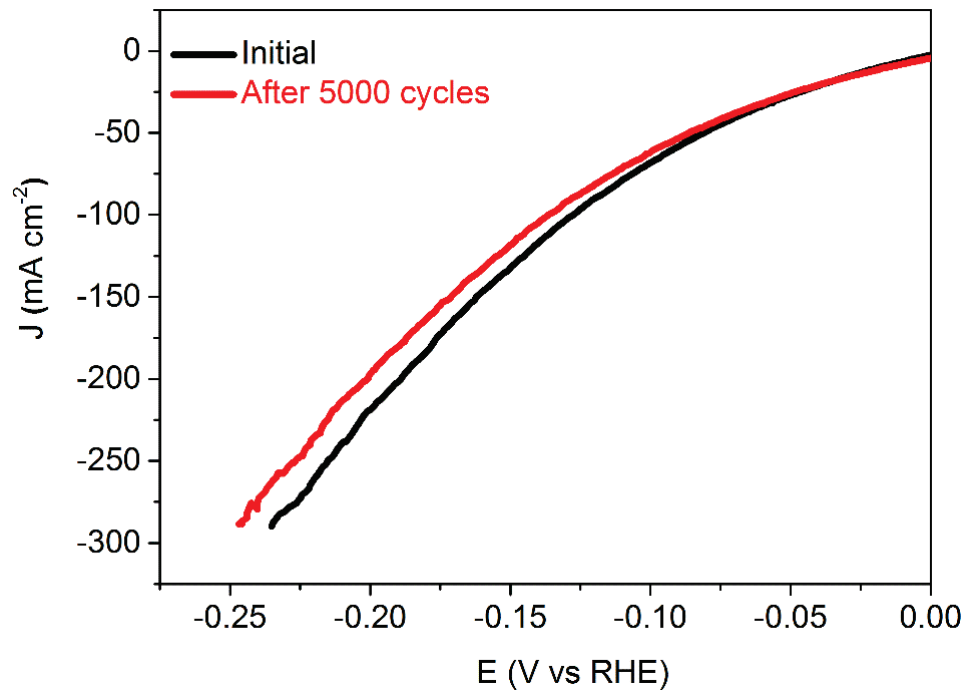

**Supplementary Fig. 18.** LSV curves of Ni<sub>3</sub>N/Ni/NF before and after 5,000 CV cycles at a scan rate of 100 mV s<sup>-1</sup> between 0 to -100 mV vs RHE in 1.0 M KPi buffer.

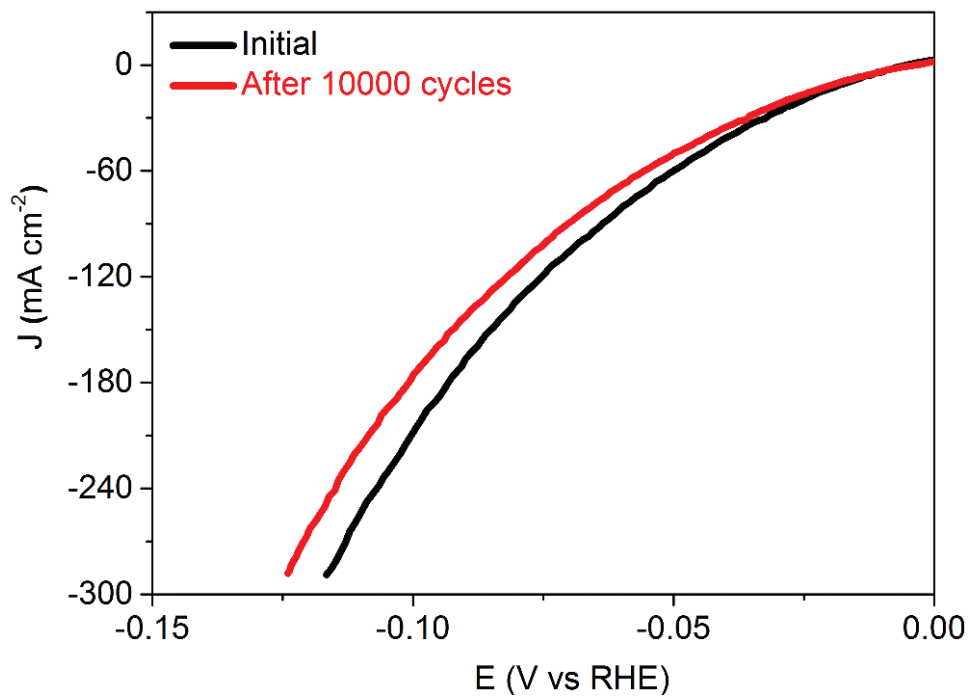

**Supplementary Fig. 19.** LSV curves of Ni<sub>3</sub>N/Ni/NF before and after 10,000 cycles at a scan rate of 100 mV s<sup>-1</sup> between 0 to -100 mV vs RHE in 1.0 M KOH.

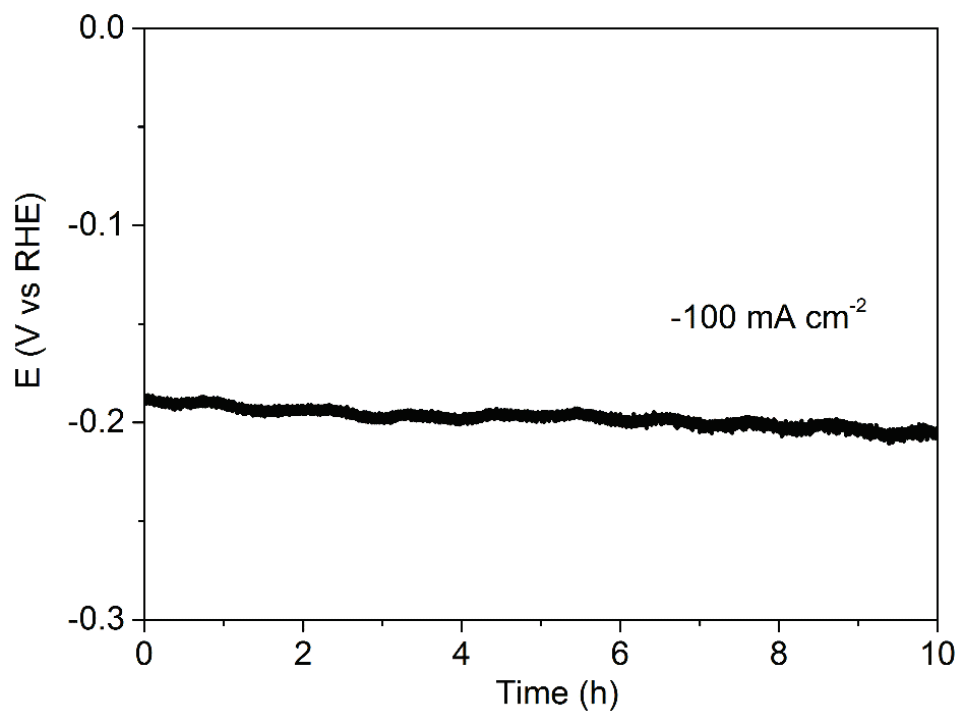

**Supplementary Fig. 20.** Chronopotentiometry curve of Ni<sub>3</sub>N/Ni/NF for HER at  $-100 \text{ mA cm}^{-2}$  in 1.0 M KOH.

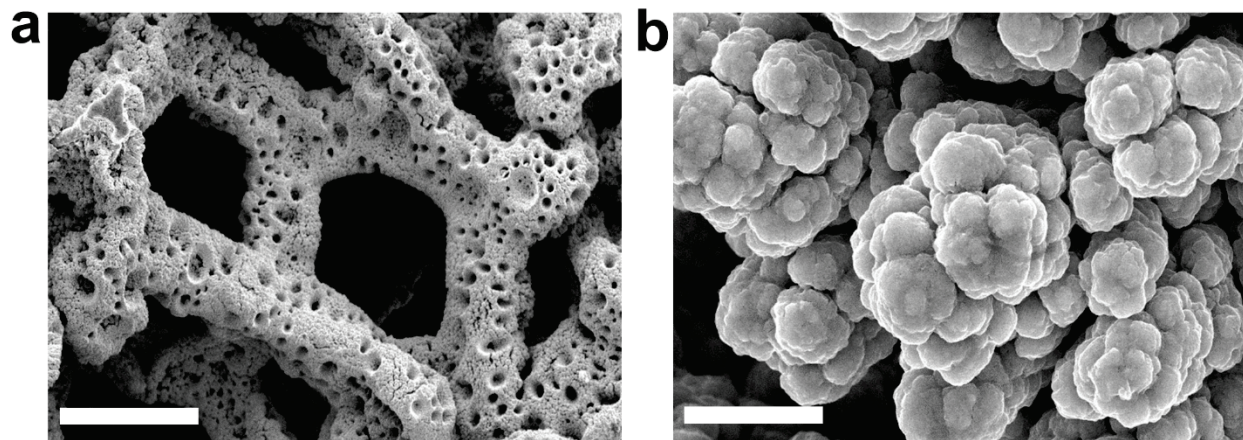

**Supplementary Fig. 21. SEM characterization of post-HER Ni<sub>3</sub>N/Ni/NF.** SEM images of Ni<sub>3</sub>N/Ni/NF after HER electrolysis at  $-10 \text{ mA cm}^{-2}$  for 50 h in 1.0 M KOH. Scale bars, 200  $\mu\text{m}$  **a**; 4  $\mu\text{m}$  **b**.

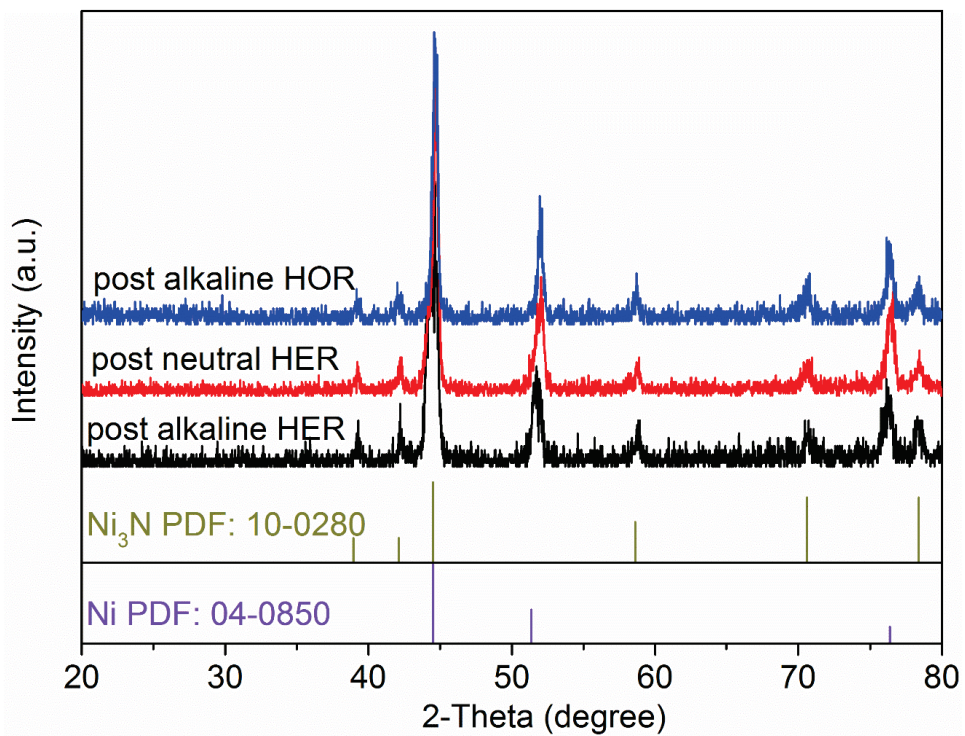

Supplementary Fig. 22. XRD patterns of post-HER/HOR Ni<sub>3</sub>N/Ni/NF.

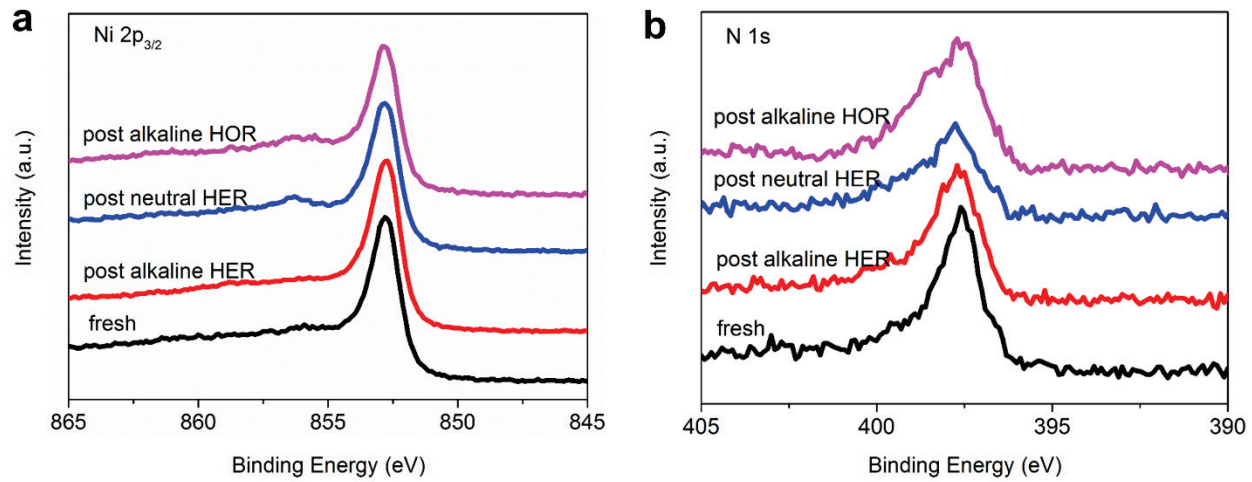

**Supplementary Fig. 23.** XPS spectra of **a** Ni 2p<sub>3/2</sub> and **b** N 1s of post-HER/HOR Ni<sub>3</sub>N/Ni/NF.



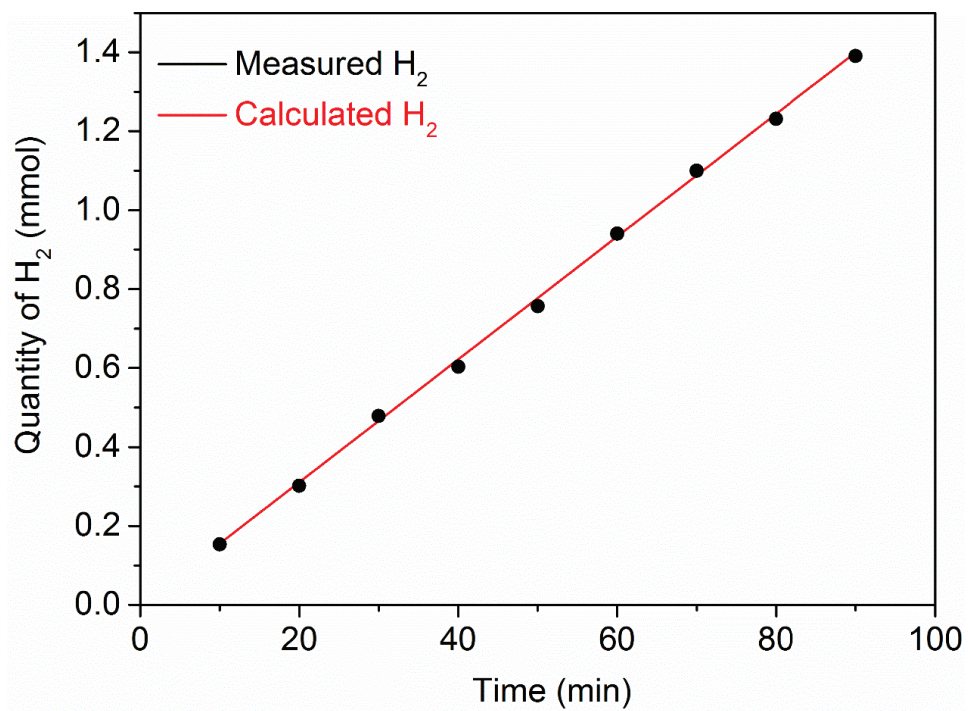

**Supplementary Fig. 24.** Comparison of measured and theoretically calculated H<sub>2</sub> amounts during the electrolysis in 1.0 M KOH at  $-200 \text{ mA cm}^{-2}$ .

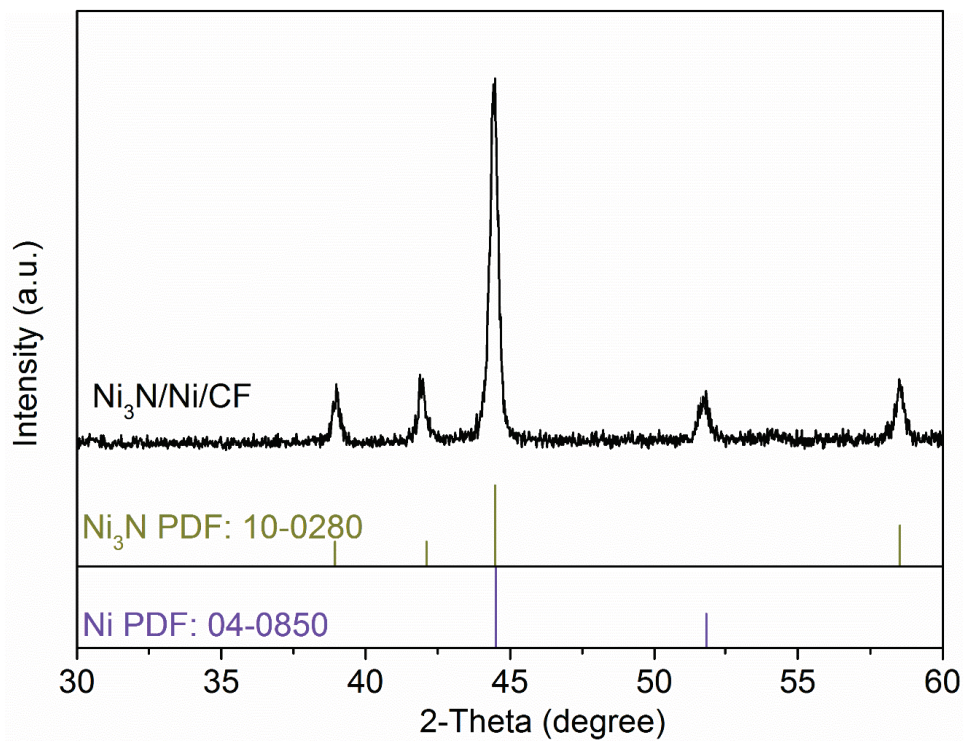

**Supplementary Fig. 25.** XRD pattern of  $\text{Ni}_3\text{N}/\text{Ni}/\text{CF}$ .

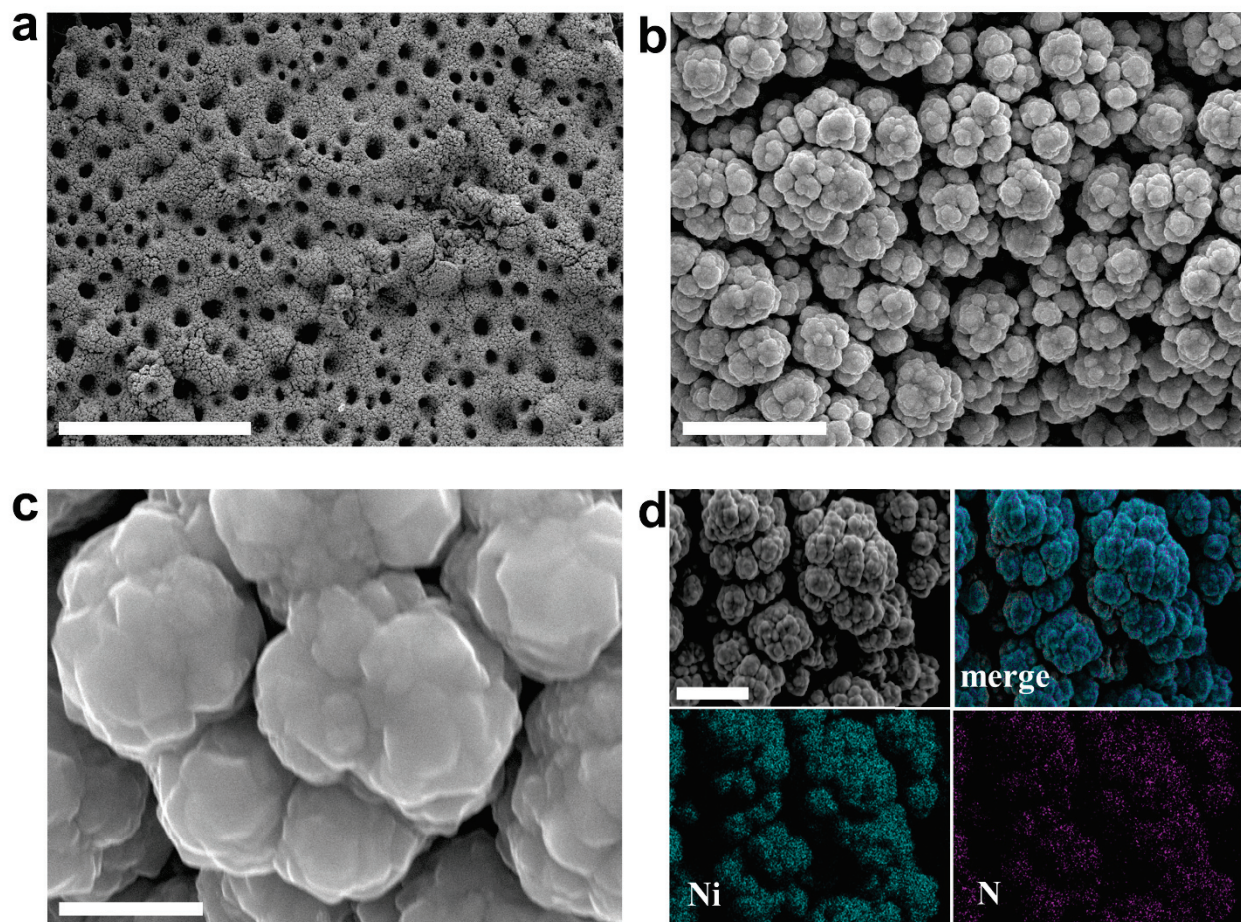

**Supplementary Fig. 26. SEM and EDX mapping characterization of Ni<sub>3</sub>N/Ni/CF.** SEM images **a-c**, and elemental maps **d** of Ni<sub>3</sub>N/Ni/CF. Scale bars, 500  $\mu\text{m}$  **a**; 10  $\mu\text{m}$  **b**; 1  $\mu\text{m}$  **c**; 5  $\mu\text{m}$  **d**.

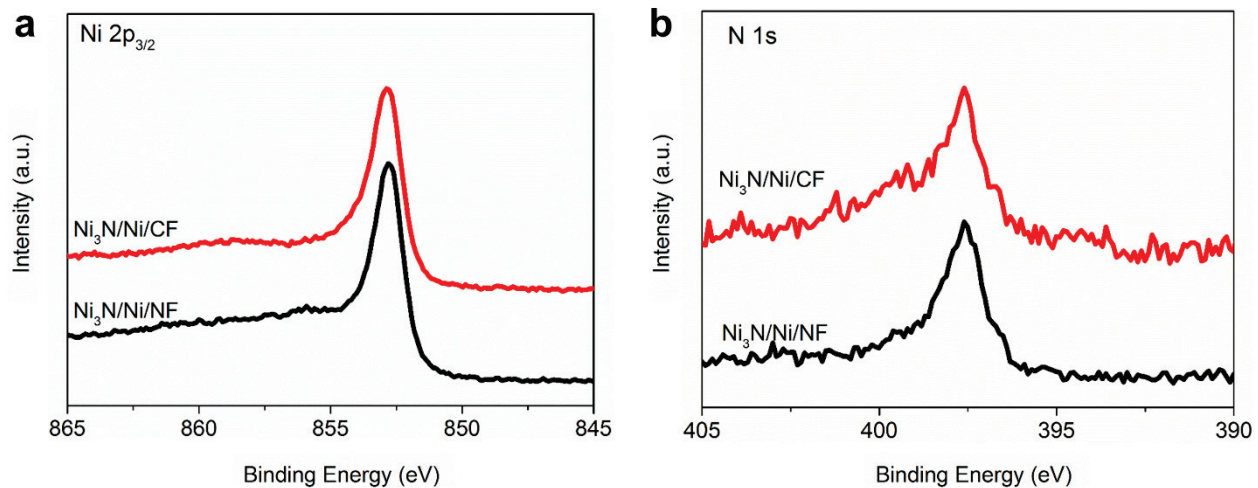

**Supplementary Fig. 27.** Comparison of **a** Ni 2p<sub>3/2</sub> and **b** N 1s XPS spectra of Ni<sub>3</sub>N/Ni/NF and Ni<sub>3</sub>N/Ni/CF.

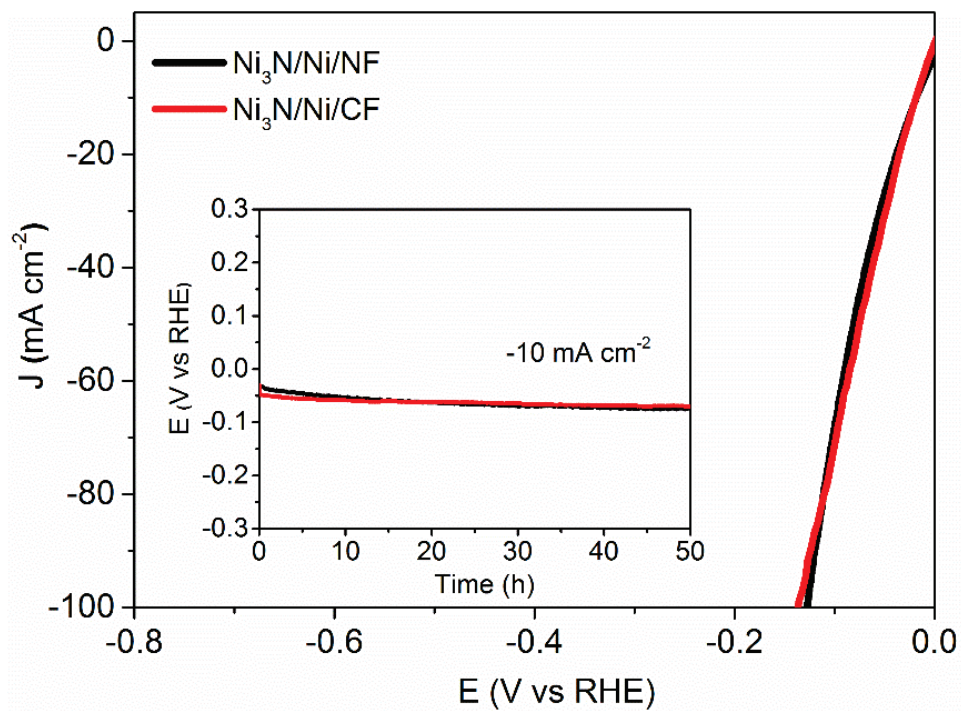

**Supplementary Fig. 28. Comparison of HER performances of Ni<sub>3</sub>N/Ni/NF and Ni<sub>3</sub>N/Ni/CF under neutral conditions.** Linear sweep voltammetry curves of Ni<sub>3</sub>N/Ni/NF and Ni<sub>3</sub>N/Ni/CF in 1.0 M KPi. The inset shows their chronopotentiometry curves measured at -10 mA cm<sup>-2</sup>.

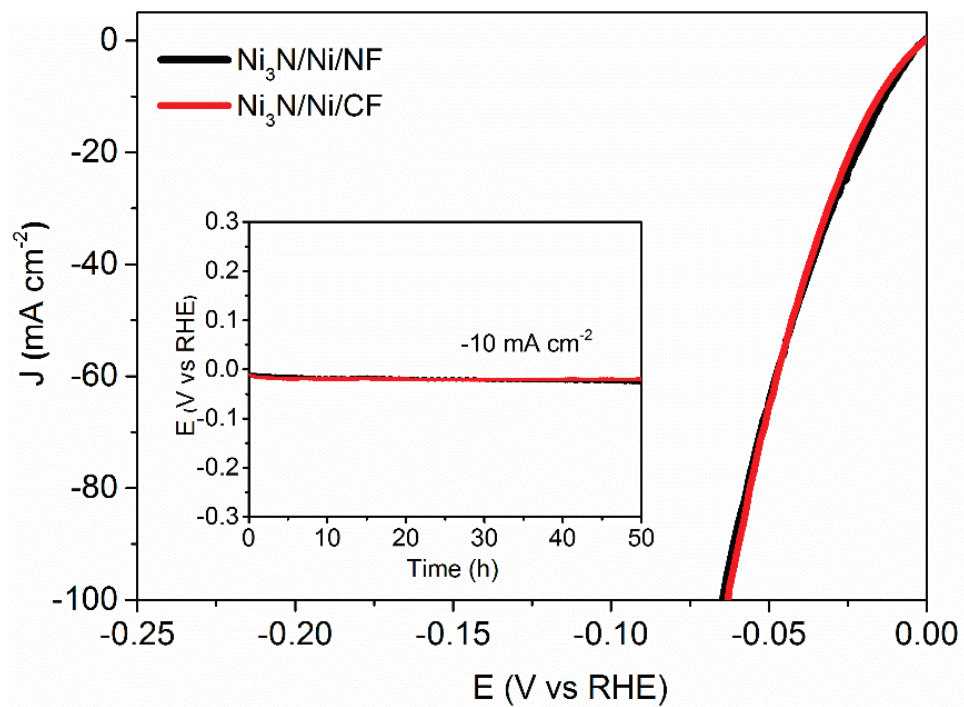

**Supplementary Fig. 29. Comparison of HER performances of  $\text{Ni}_3\text{N}/\text{Ni}/\text{NF}$  and  $\text{Ni}_3\text{N}/\text{Ni}/\text{CF}$  under alkaline conditions.** Linear sweep voltammetry curves of  $\text{Ni}_3\text{N}/\text{Ni}/\text{NF}$  and  $\text{Ni}_3\text{N}/\text{Ni}/\text{CF}$  in 1.0 M KOH. The inset shows their chronopotentiometry curves measured at  $-10 \text{ mA cm}^{-2}$ .

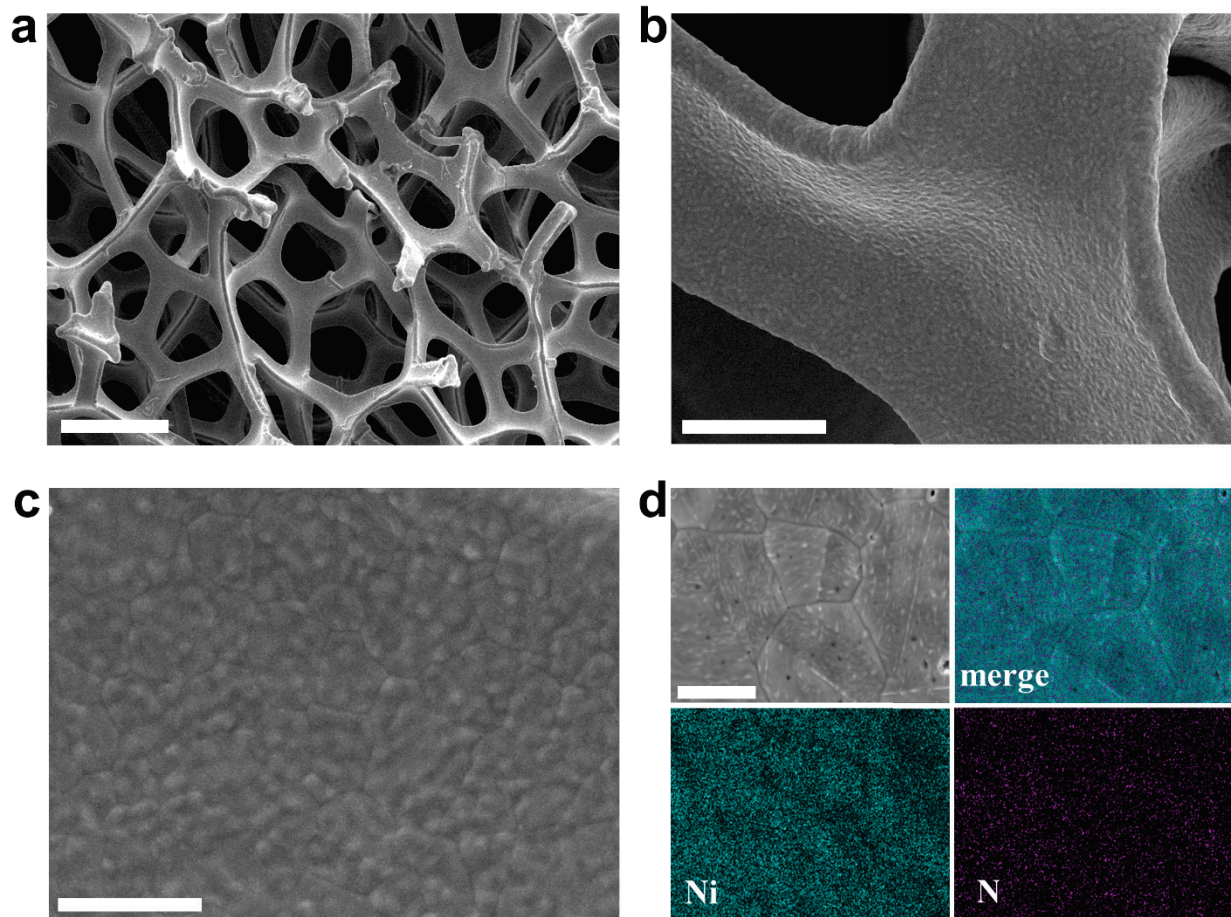

**Supplementary Fig. 30. SEM and EDX mapping characterization of  $\text{Ni}_3\text{N}/\text{NF}$ . SEM images a-c, and elemental maps d of  $\text{Ni}_3\text{N}/\text{NF}$ . Scale bars, 500  $\mu\text{m}$  a; 50  $\mu\text{m}$  b; 20  $\mu\text{m}$  c; 5  $\mu\text{m}$  d.**

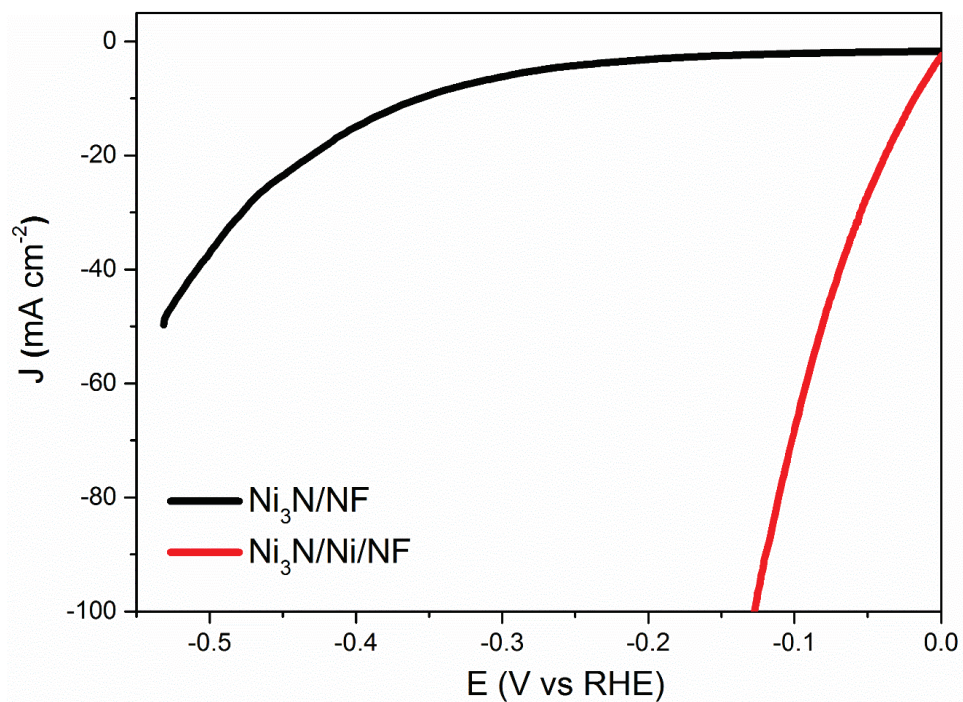

**Supplementary Fig. 31. Comparison of HER performances of Ni<sub>3</sub>N/Ni/NF and Ni<sub>3</sub>N/NF under neutral conditions.** Linear sweep voltammetry (LSV) curves of Ni<sub>3</sub>N/Ni/NF and Ni<sub>3</sub>N/NF for HER in H<sub>2</sub>-saturated 1.0 M KPi.



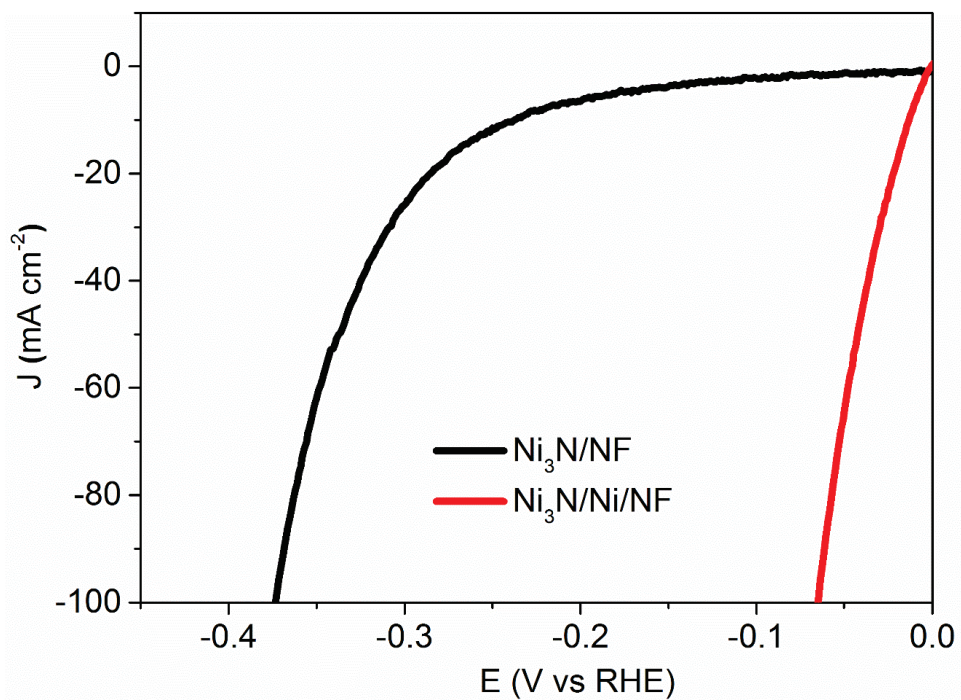

**Supplementary Fig. 32. Comparison of HER performances of Ni<sub>3</sub>N/Ni/NF and Ni<sub>3</sub>N/NF under alkaline conditions.** Linear sweep voltammetry (LSV) curves of Ni<sub>3</sub>N/Ni/NF and Ni<sub>3</sub>N/NF for HER in H<sub>2</sub>-saturated 1.0 M KOH.

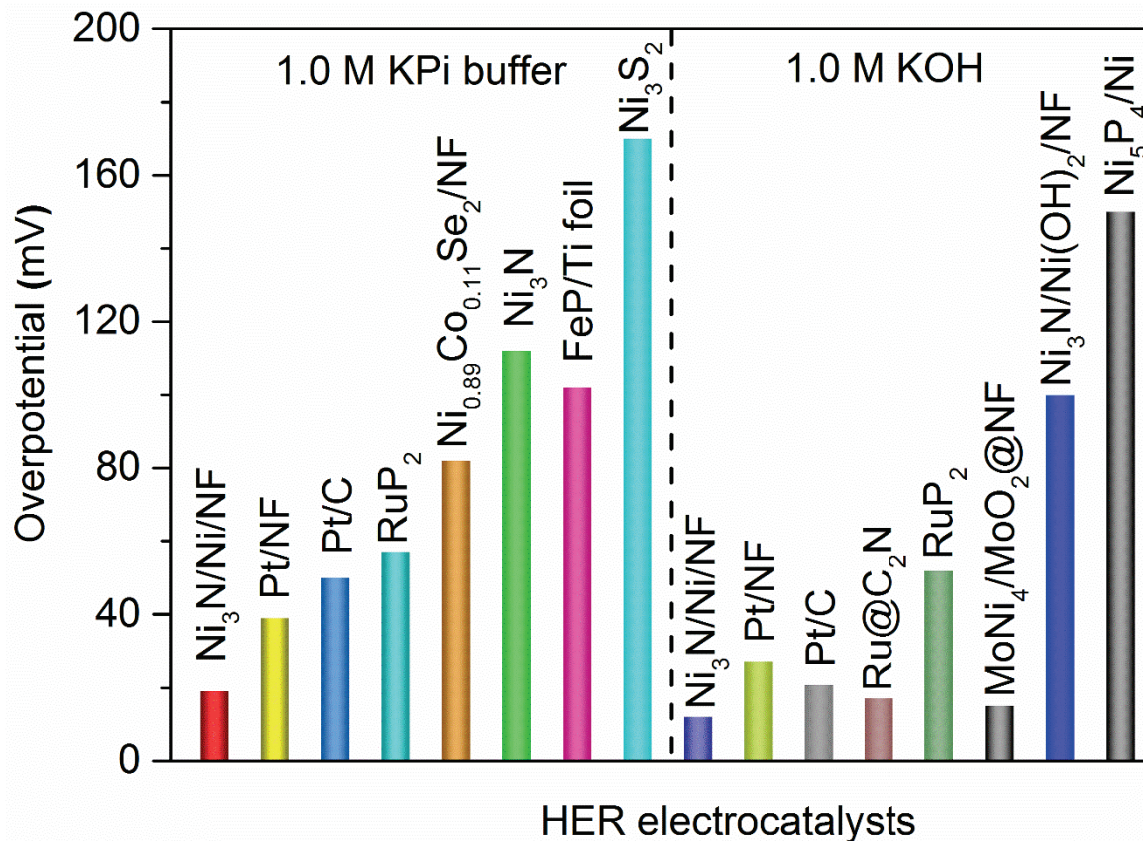

**Supplementary Fig. 33.** Comparison of overpotential requirement to deliver  $-10 \text{ mA cm}^{-2}$  for HER electrocatalysts in various electrolytes. Data are summarized in **Supplementary Table 3**.

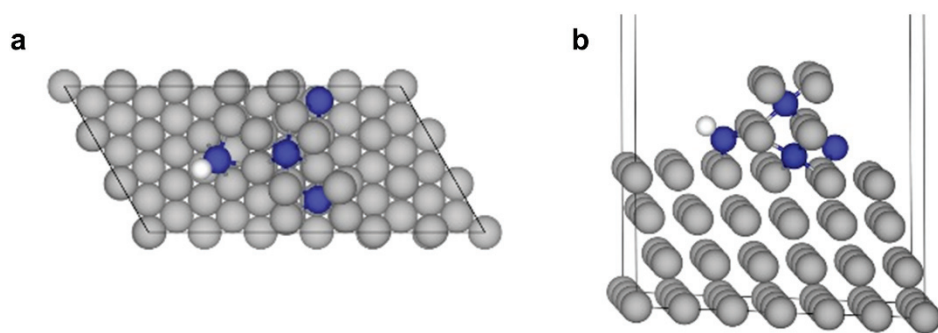

**Supplementary Fig. 34. H adsorption structures.** **a** Top view and **b** side view of  $\text{Ni}_3\text{N}/\text{Ni}_\text{N}$ . Color code: Ni: grey; N: blue; H: white.

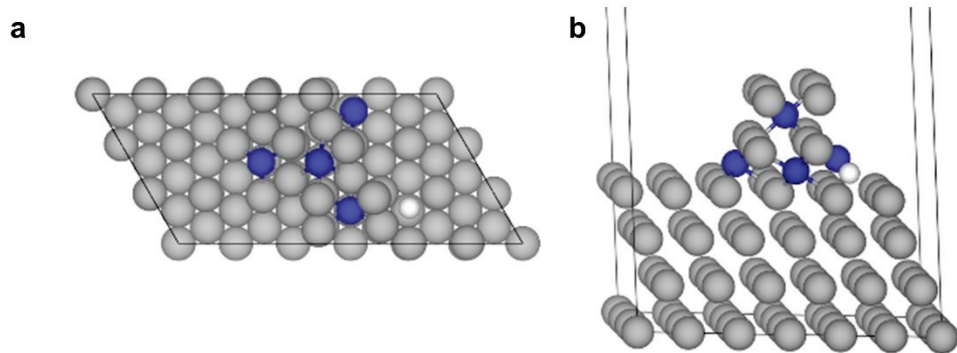

**Supplementary Fig. 35. H adsorption structures.** **a** Top view and **b** side view of Ni<sub>3</sub>N/Ni\_hollow. Color code: Ni: grey; N: blue; H: white.

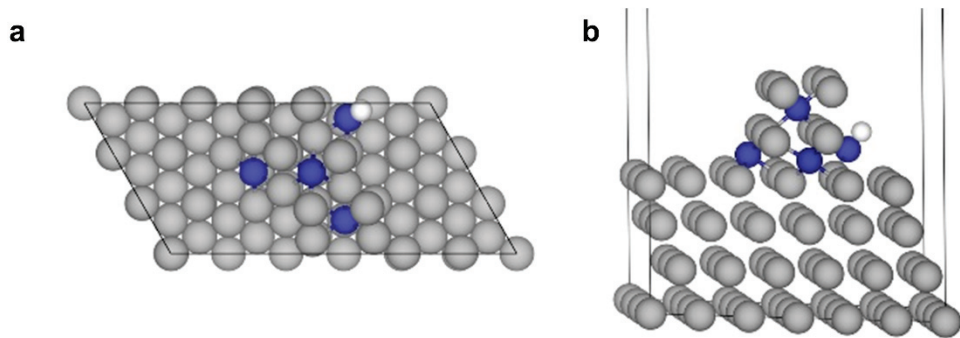

**Supplementary Fig. 36. H adsorption structures.** **a** Top view and **b** side view of Ni<sub>3</sub>N/Ni<sub>N\_2</sub>. Color code: Ni: grey; N: blue; H: white.

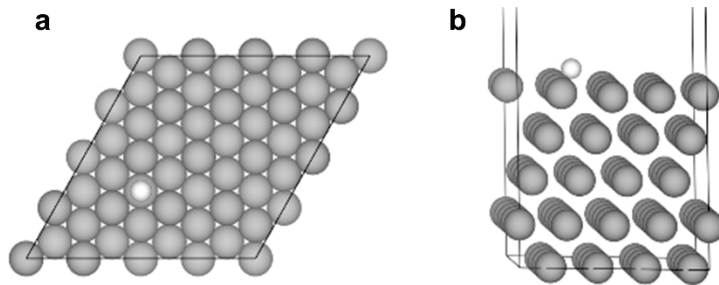

**Supplementary Fig. 37. H adsorption structures.** **a** Top view and **b** side view of Ni. H is on top of three-fold hollow site of Ni. There is a Ni beneath H in the *third* Ni layer. Color code: Ni: grey; H: white.

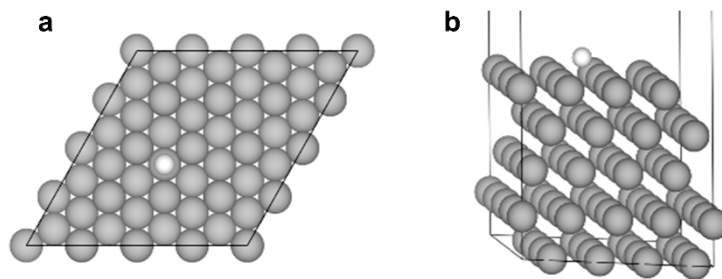

**Supplementary Fig. 38. H adsorption structures.** **a** Top view and **b** side view of Ni<sub>2</sub>. H is on top of three-fold hollow site of Ni. There is a Ni beneath H in the *second* Ni layer. Color code: Ni: grey; H: white.

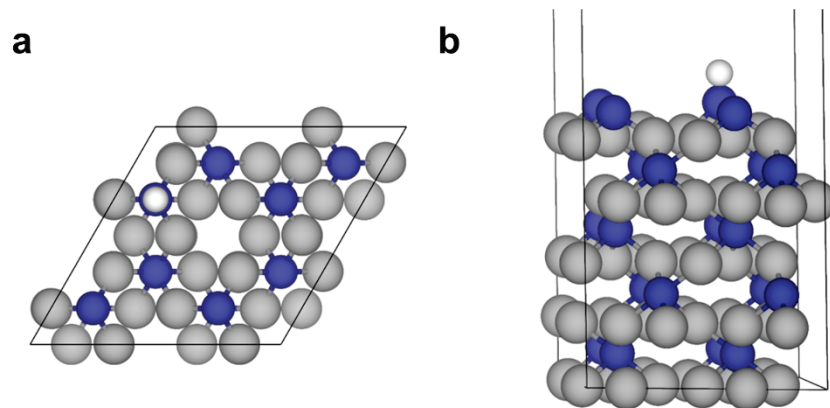

**Supplementary Fig. 39. H adsorption structures.** **a** Top view and **b** side view of Ni<sub>3</sub>N<sub>2</sub>. Color code: Ni: grey; N: blue; H: white.



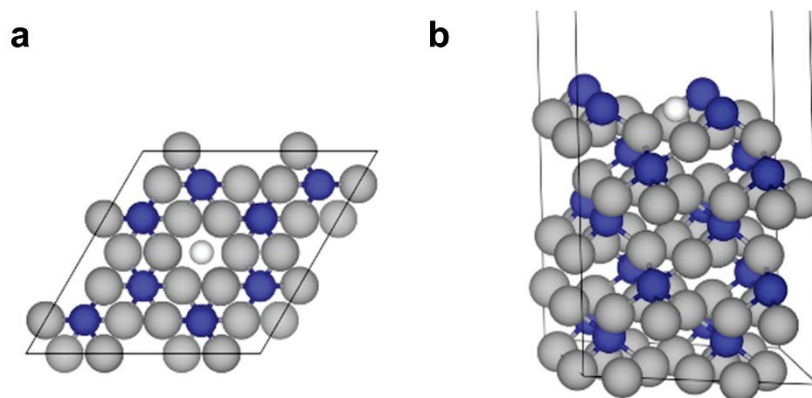

**Supplementary Fig. 40. H adsorption structures.** **a** Top view and **b** side view of Ni<sub>3</sub>N\_hollow. Color code: Ni: grey; N: blue; H: white.

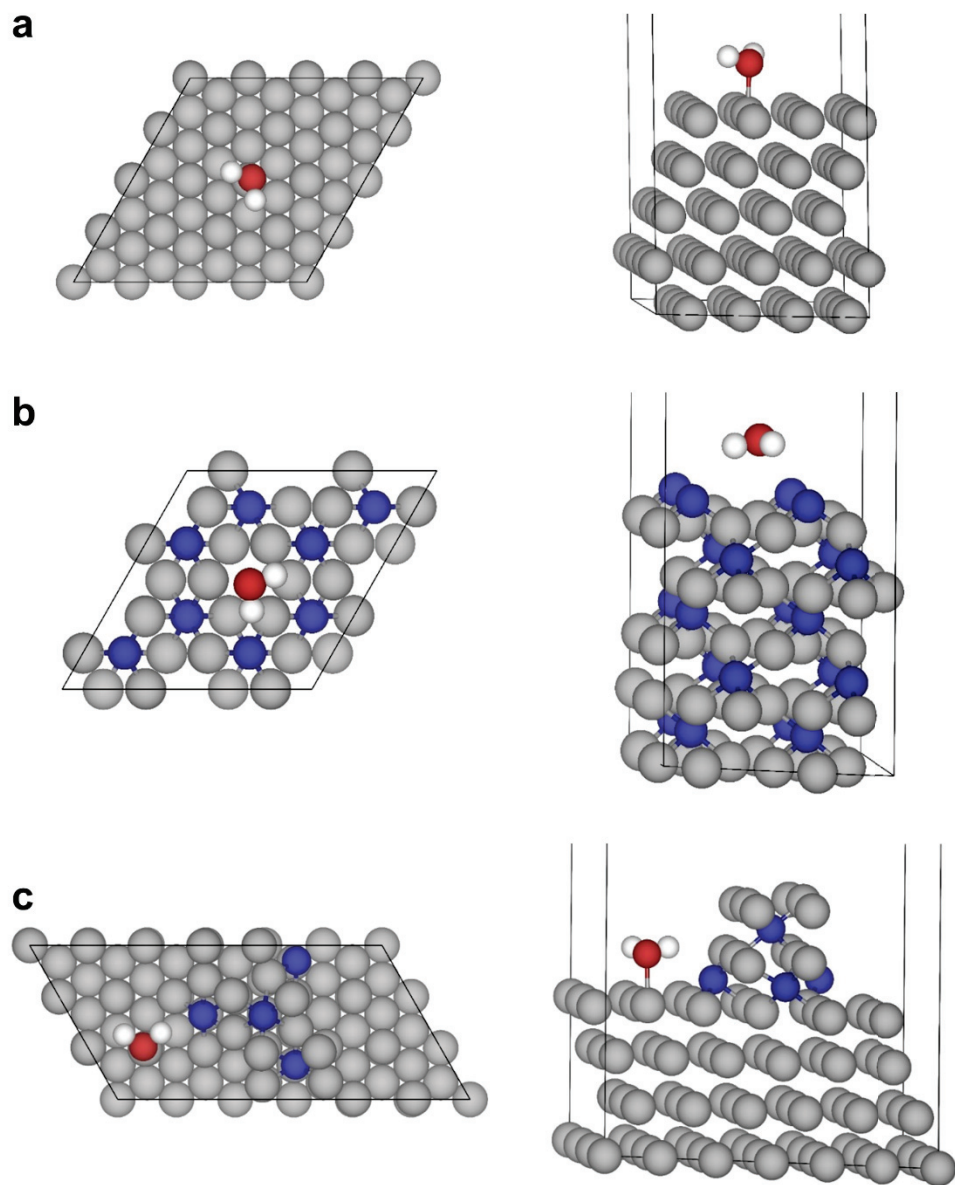

**Supplementary Fig. 41. H<sub>2</sub>O adsorption structures.** Top view and side view for water adsorption on **a** Ni, **b** Ni<sub>3</sub>N, and **c** Ni<sub>3</sub>N/Ni interface. Color code: Ni: grey; N: blue; H: white; O: red.

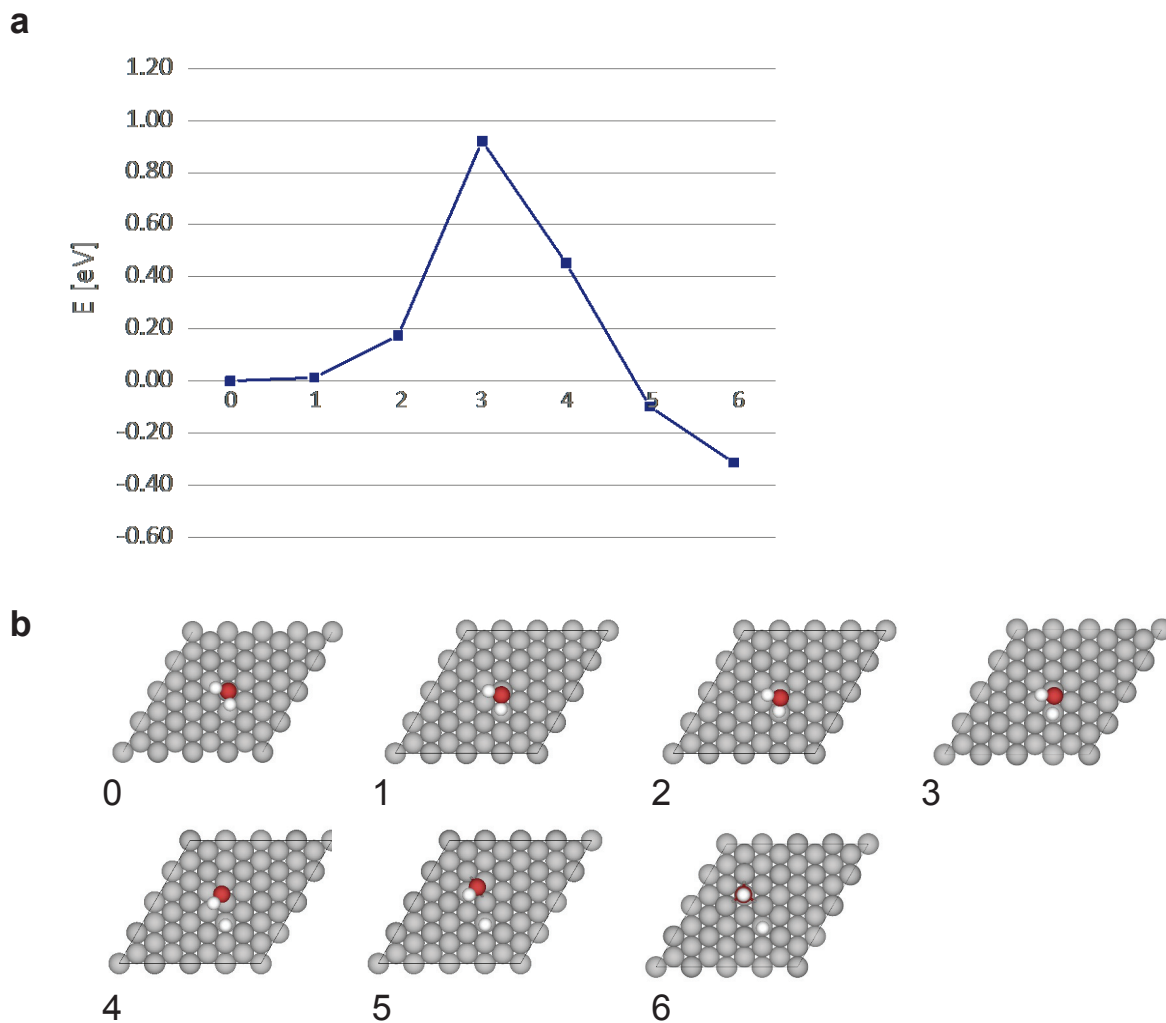

**Supplementary Fig. 42. H<sub>2</sub>O dissociation pathways.** **a** Energy pathway for water dissociation on Ni(111). **b** Top view of intermediate structures. Ni (111), barrier = 0.92 eV. Color code: Ni: grey; H: white; O: red.

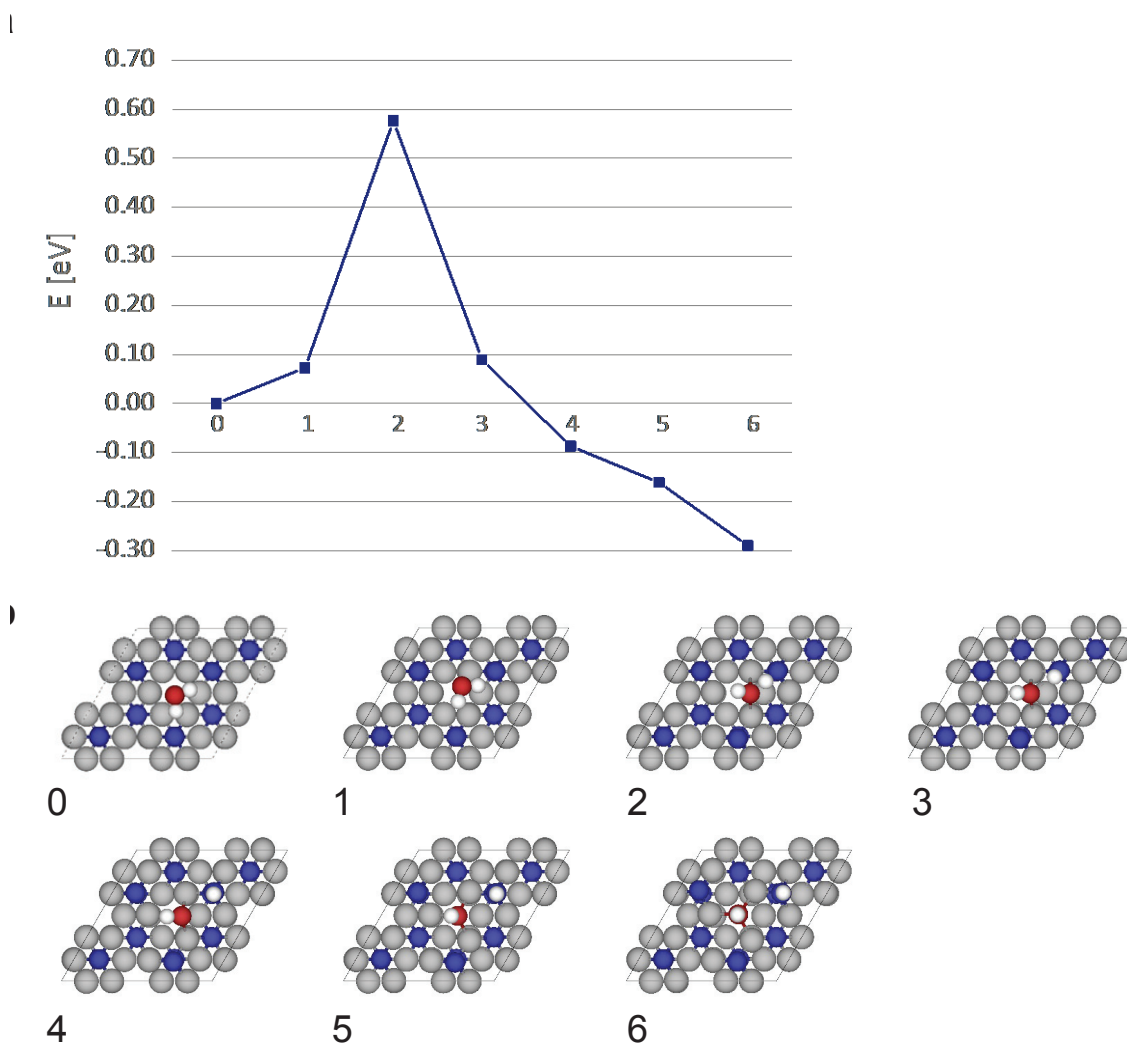

**Supplementary Fig. 43. H<sub>2</sub>O dissociation pathways. a** Energy pathway for water dissociation on Ni<sub>3</sub>N (001). **b** Top view of intermediate structures. Ni<sub>3</sub>N (001), barrier = 0.58 eV. Color code: Ni: grey; N: blue; H: white; O: red.

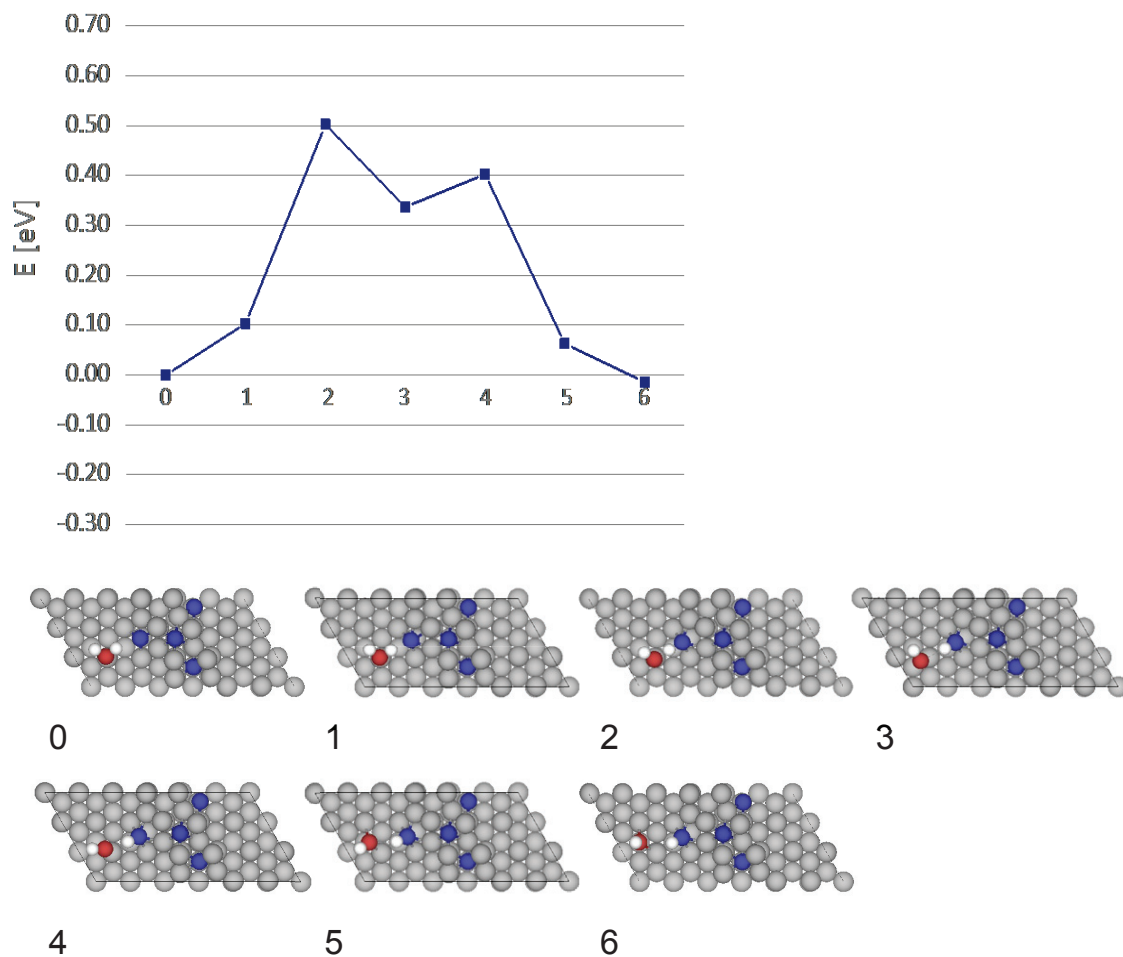

**Supplementary Fig. 44. H<sub>2</sub>O dissociation pathways.** **a** Energy pathway for water dissociation on hybrid structure. **b** Top view of intermediate structures. Hybrid structure, barrier = 0.50 eV. Color code: Ni: grey; N: blue; H: white; O: red.

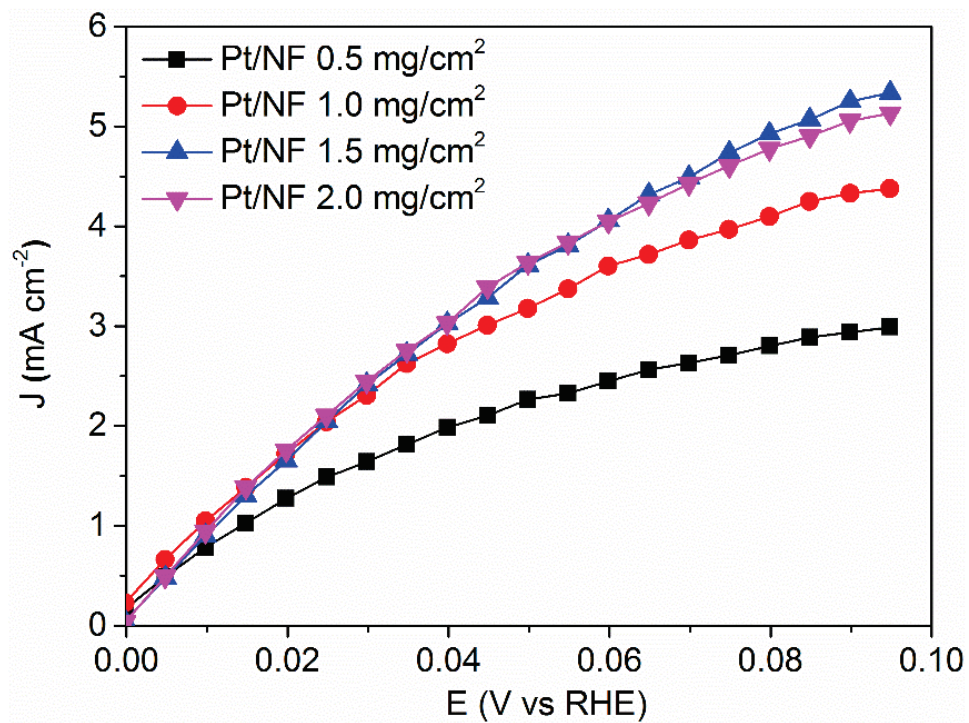

**Supplementary Fig. 45. HOR performance of Pt/C loaded on NF under alkaline conditions.** Steady-state polarization curves Pt/NF with different mass loadings of Pt/C for HOR in  $\text{H}_2$ -saturated 0.1 M KOH.

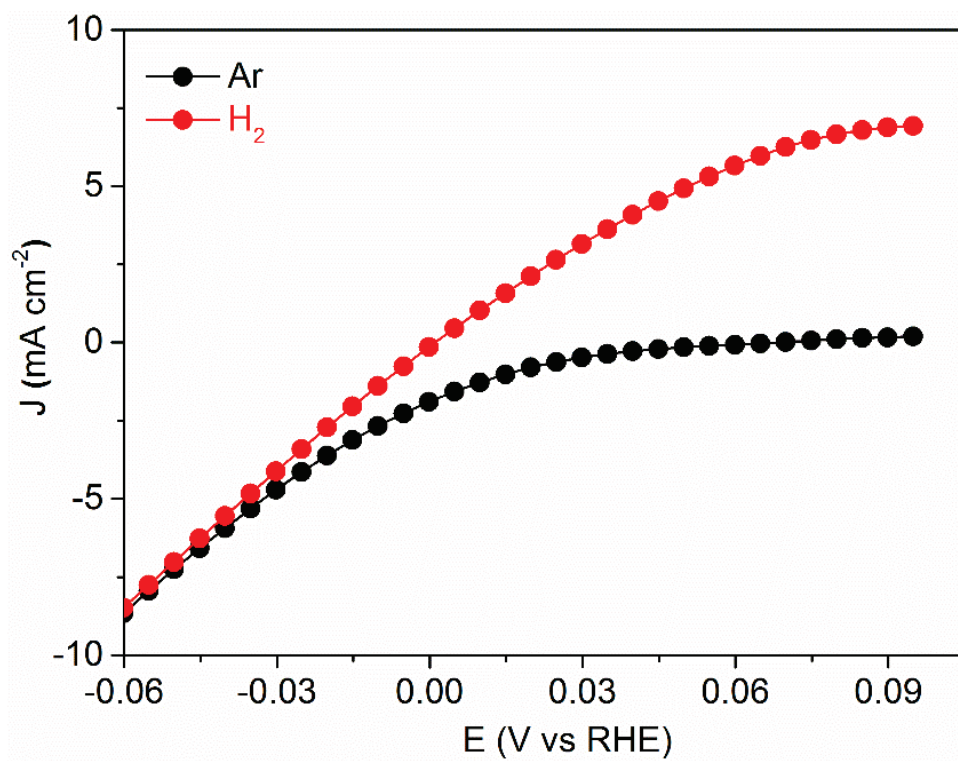

**Supplementary Fig. 46.** Steady-state polarization curves of Ni<sub>3</sub>N/Ni/NF in Ar and H<sub>2</sub>-saturated 0.1 M KOH.

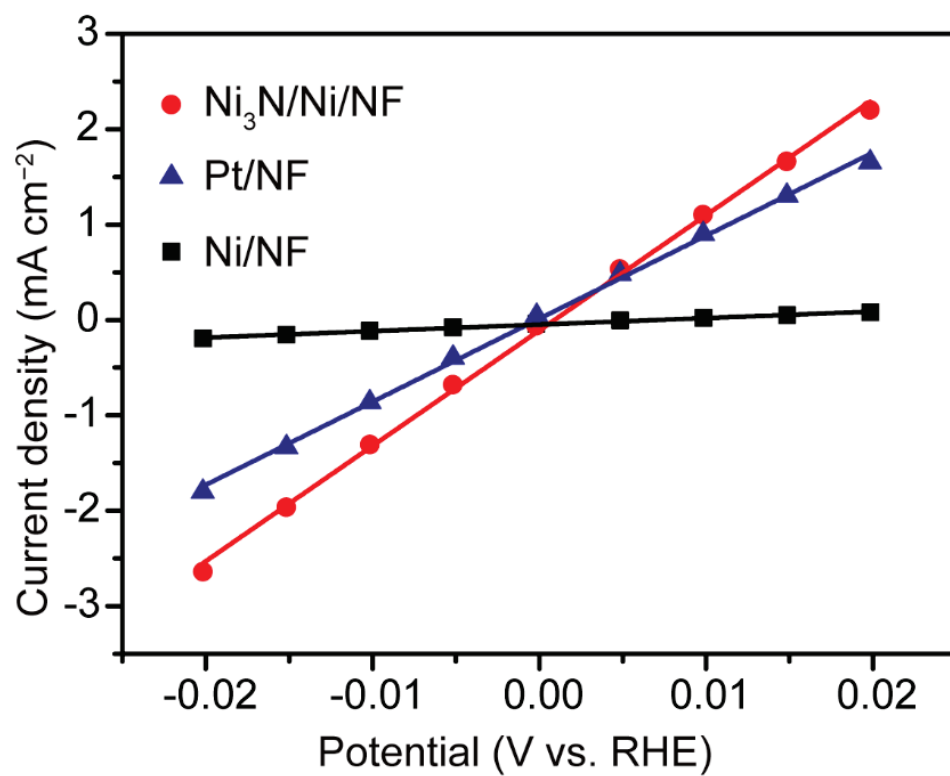

**Supplementary Fig. 47.** The steady-state polarization curves of Ni<sub>3</sub>N/Ni/NF, Pt/NF, and Ni/NF in the micro-polarization region (-20 mV to 20 mV vs. RHE) in H<sub>2</sub>-saturated 0.1 M KOH.



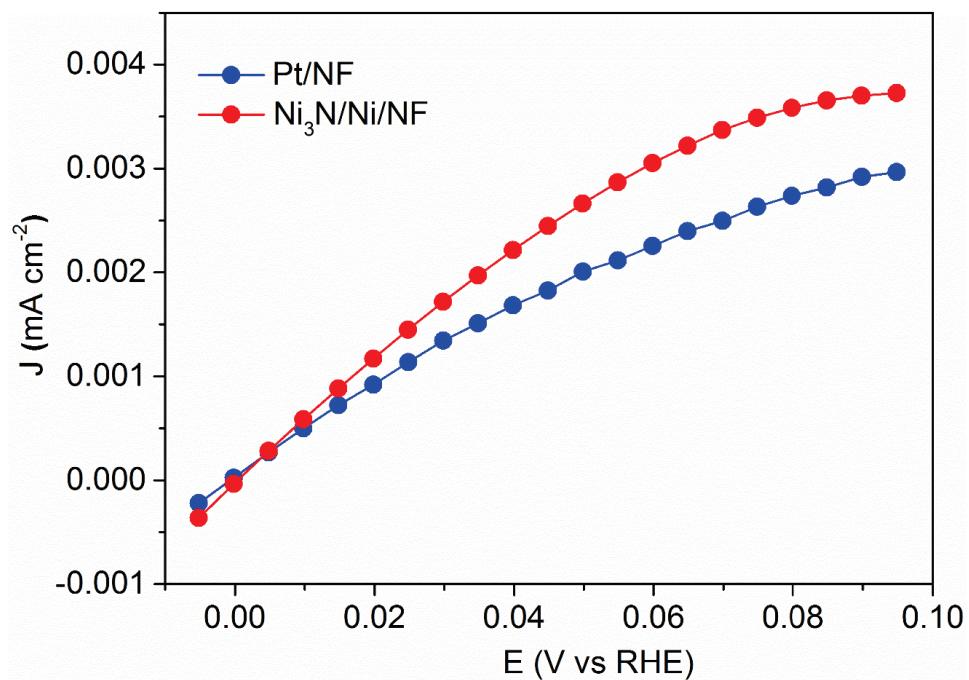

**Supplementary Fig. 48.** The BET surface area-normalized steady-state polarization curves of optimized Pt/NF (1.5 mg cm<sup>-2</sup>) and Ni<sub>3</sub>N/Ni/NF for HOR in H<sub>2</sub>-saturated 0.1 M KOH.

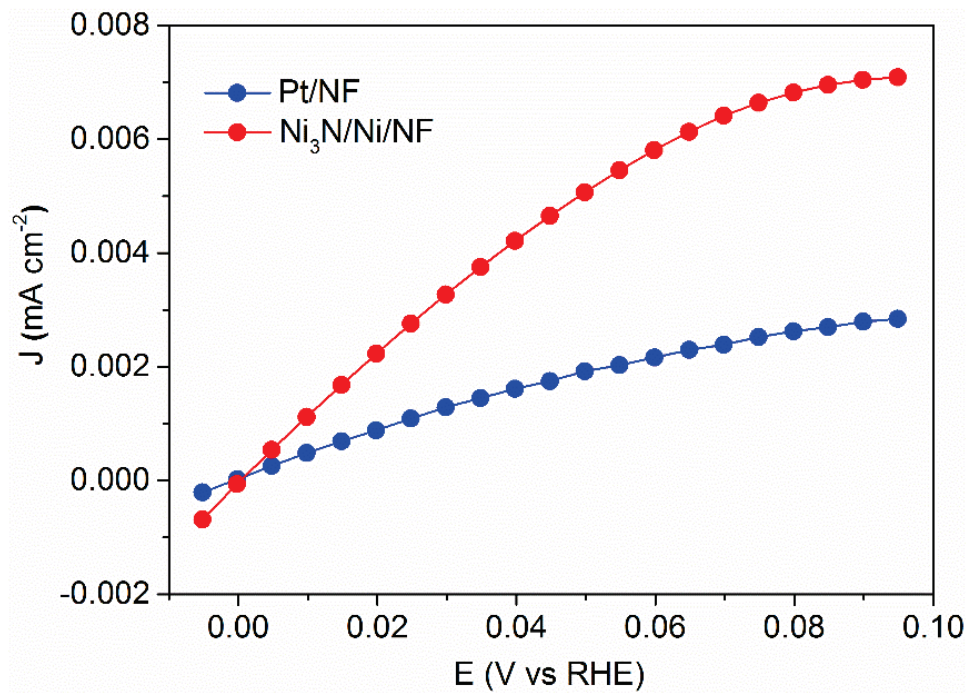

**Supplementary Fig. 49.** The ECSA-normalized steady-state polarization curves of optimized Pt/NF (1.5 mg/cm<sup>2</sup>) and Ni<sub>3</sub>N/Ni/NF for HOR in 0.1 M KOH.

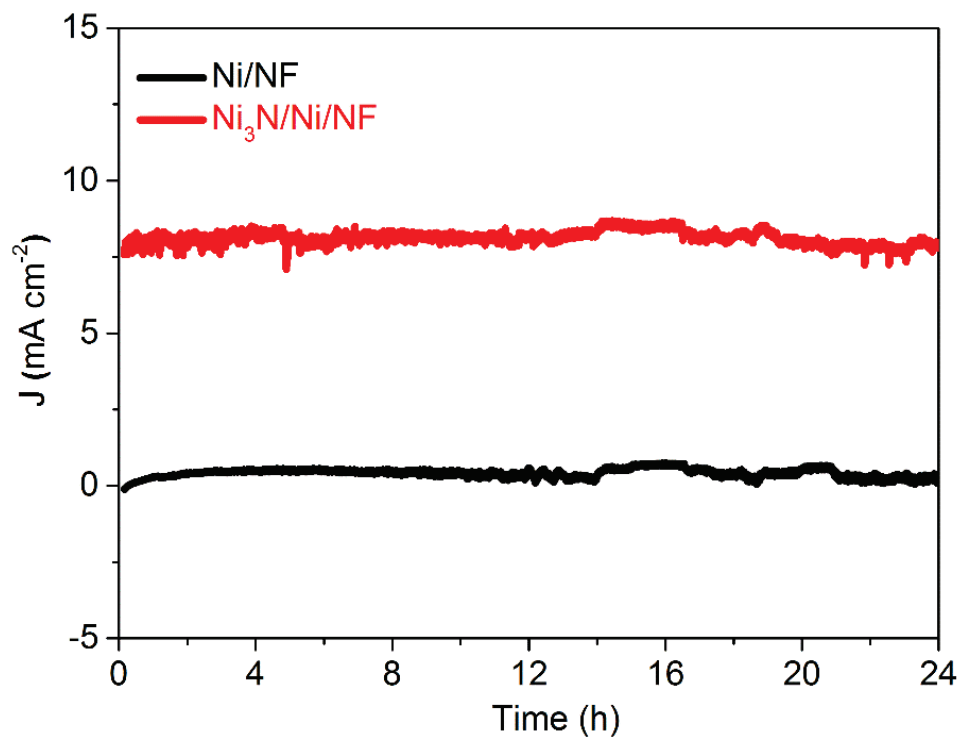

**Supplementary Fig. 50.** Chronoamperometry curves of Ni<sub>3</sub>N/Ni/NF and Ni/NF at 0.09 V vs. RHE in H<sub>2</sub>-saturated 0.1 M KOH.

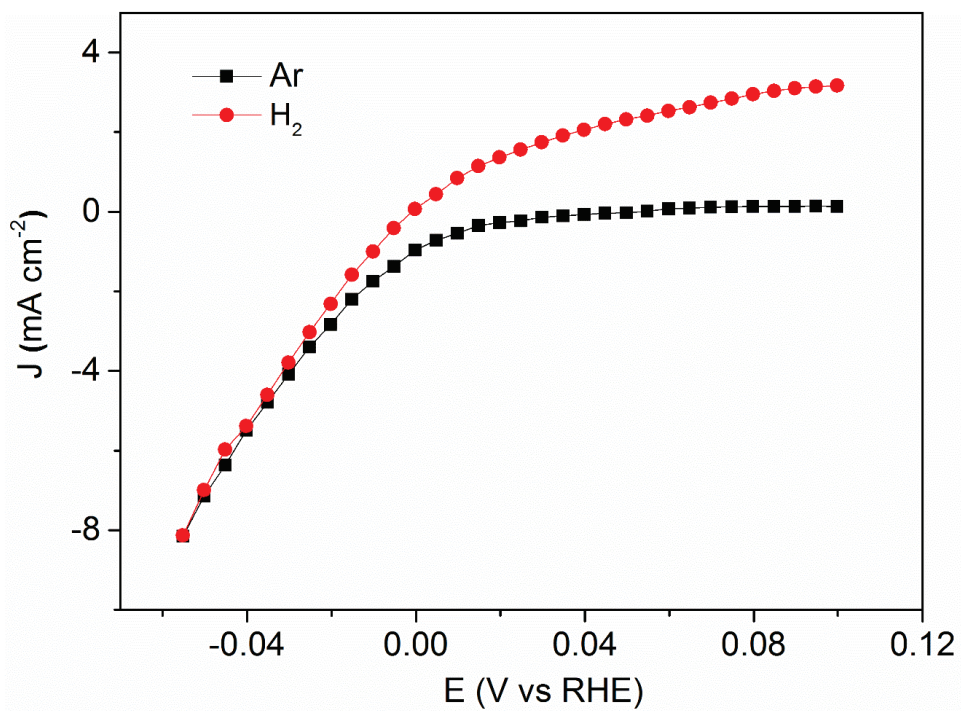

**Supplementary Fig. 51.** Steady-state polarization curves of Ni<sub>3</sub>N/Ni/CF in Ar and H<sub>2</sub>-saturated 0.1 M KOH.

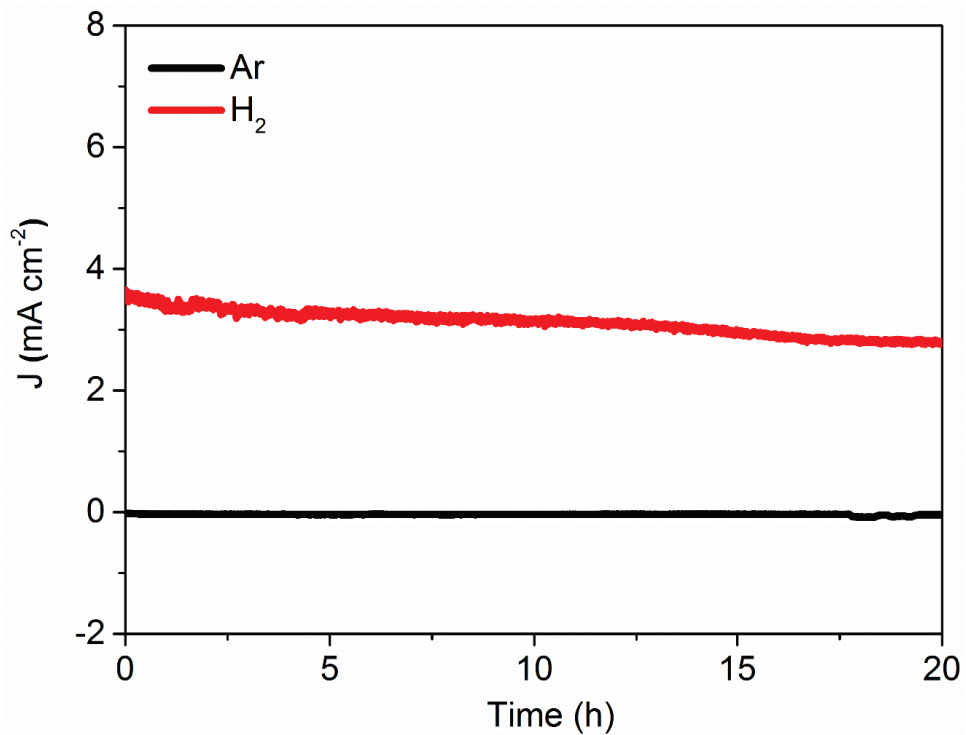

**Supplementary Fig. 52.** Chronoamperometry curves of Ni<sub>3</sub>N/Ni/CF at 0.09 V vs. RHE in Ar and H<sub>2</sub>-saturated 0.1 M KOH.

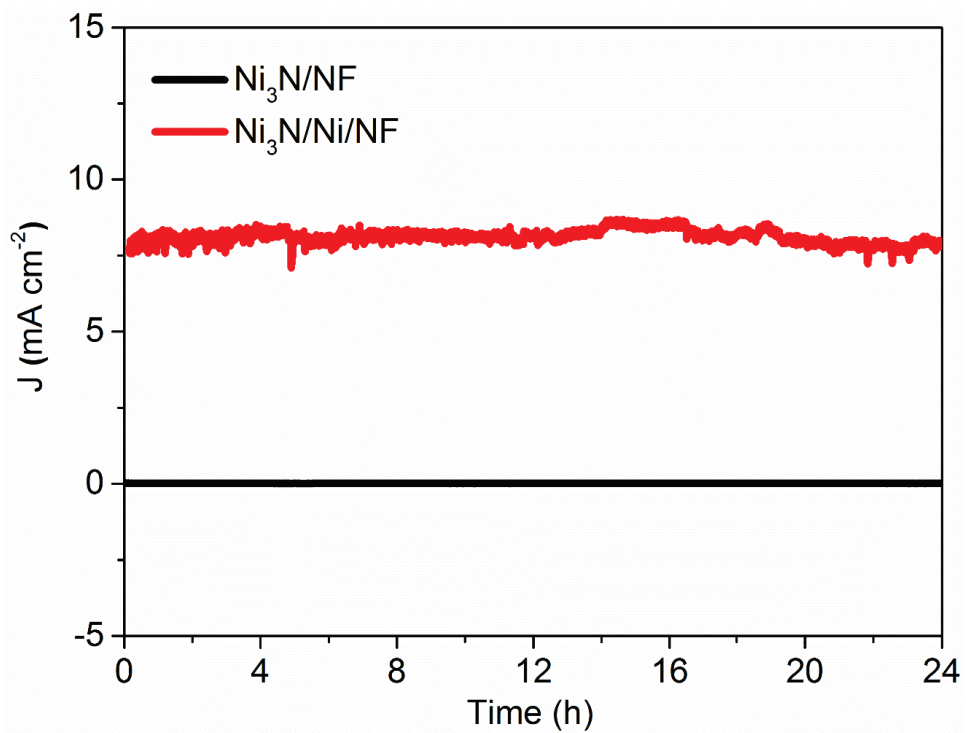

**Supplementary Fig. 53.** Chronoamperometry curves of Ni<sub>3</sub>N/Ni/NF and Ni<sub>3</sub>N/NF at 0.09 V vs. RHE in H<sub>2</sub>-saturated 0.1 M KOH.

**a**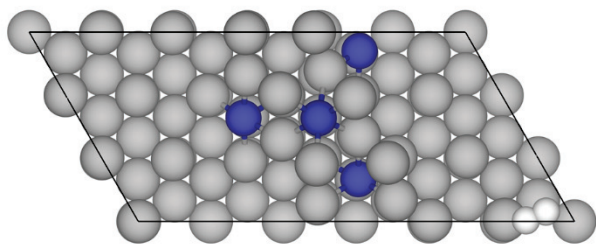**b**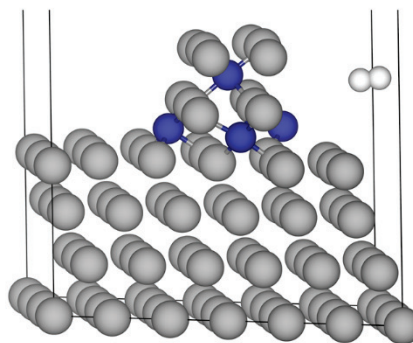

**Supplementary Fig. 54. H<sub>2</sub> adsorption structures.** **a** Top view and **b** side view of H<sub>2</sub> adsorption on Ni<sub>3</sub>N/Ni. Color code: Ni: grey; N: blue; H: white. Adsorption energy for H<sub>2</sub> adsorption: -0.02 eV.

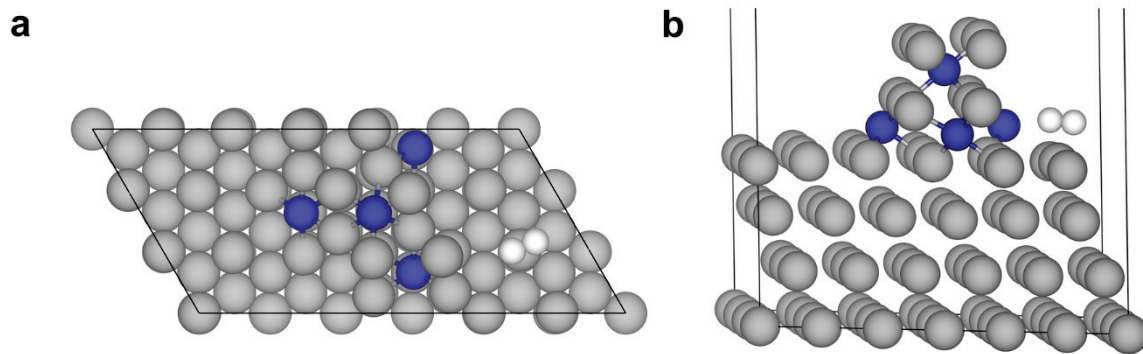

**Supplementary Fig. 55. H<sub>2</sub> adsorption structures.** **a** Top view and **b** side view of H<sub>2</sub> adsorption on Ni<sub>3</sub>N/Ni. Color code: Ni: grey; N: blue; H: white. Adsorption energy for H<sub>2</sub> adsorption: -0.16 eV.



**a**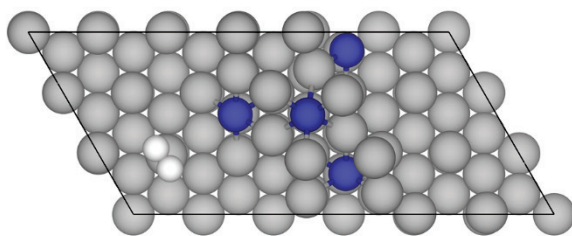**b**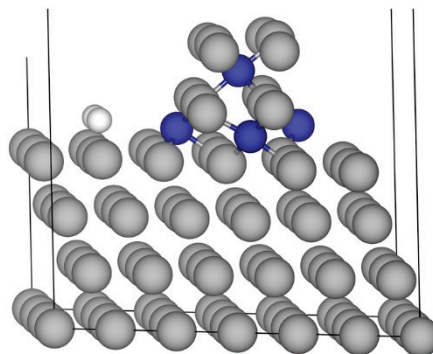

**Supplementary Fig. 56. H<sub>2</sub> adsorption structures.** **a** Top view and **b** side view of H<sub>2</sub> adsorption on Ni<sub>3</sub>N/Ni. Color code: Ni: grey; N: blue; H: white. Adsorption energy for H<sub>2</sub> adsorption: -0.18 eV.

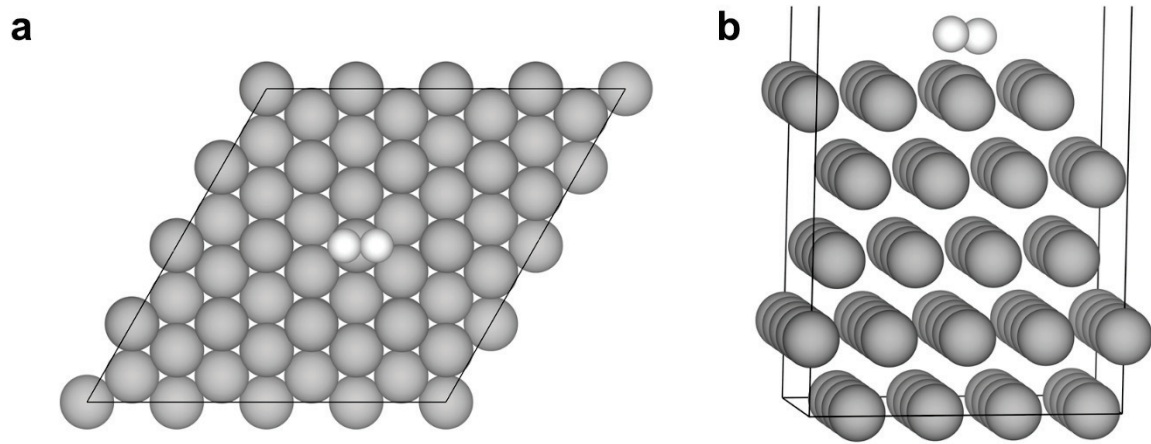

**Supplementary Fig. 57. H<sub>2</sub> adsorption structures.** **a** Top view and **b** side view of H<sub>2</sub> adsorption on Ni. Color code: Ni: grey; H: white. Adsorption energy for H<sub>2</sub> adsorption: -0.26 eV.

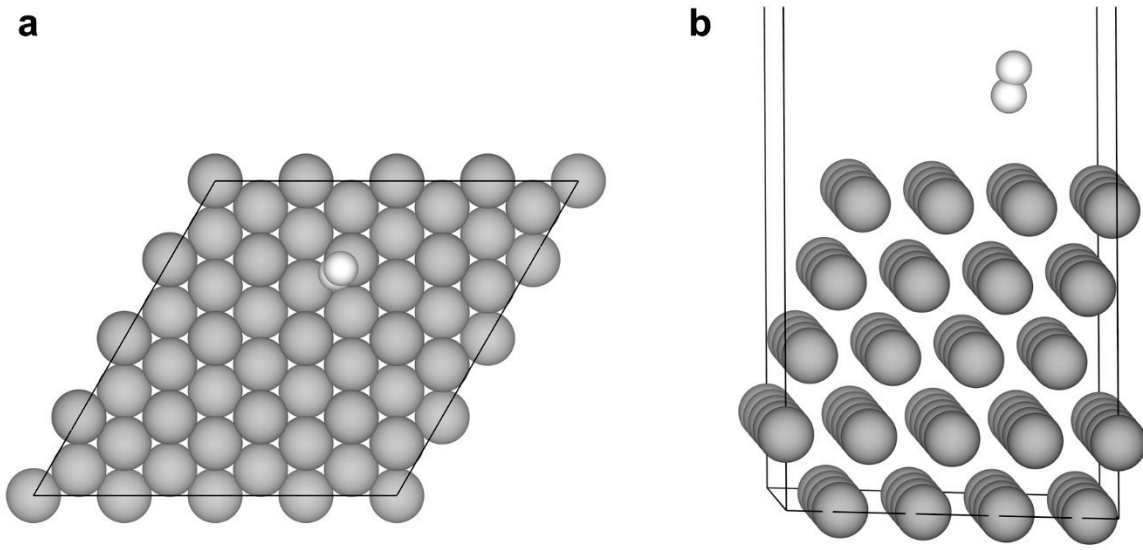

**Supplementary Fig. 58. H<sub>2</sub> adsorption structures. a** Top view and **b** side view of H<sub>2</sub> adsorption on Ni. Color code: Ni: grey; H: white. Adsorption energy for H<sub>2</sub> adsorption: 0.004 eV.

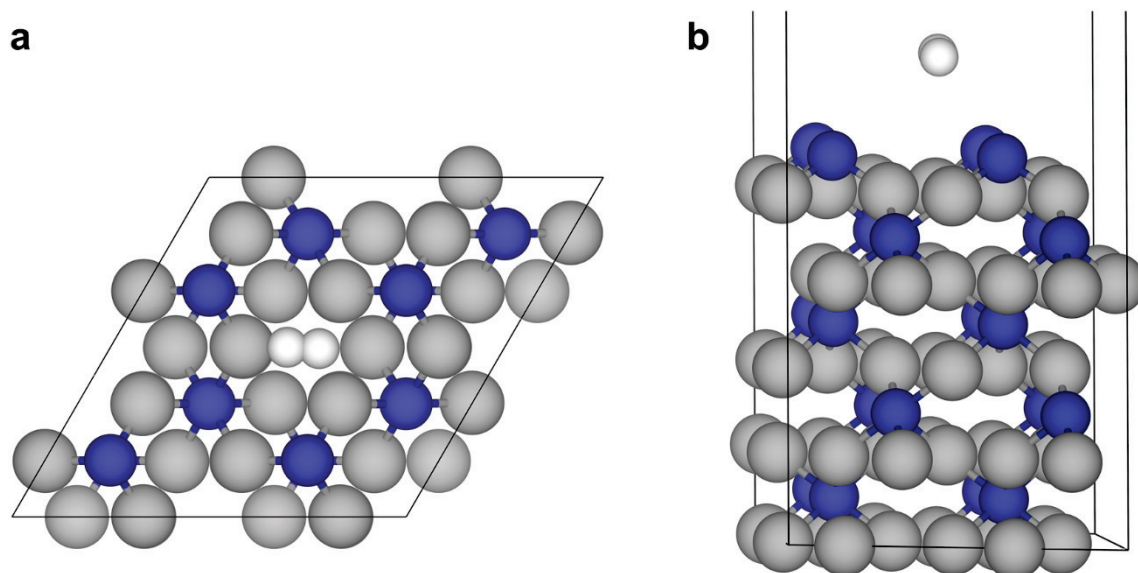

**Supplementary Fig. 59. H<sub>2</sub> adsorption structures.** **a** Top view and **b** side view of H<sub>2</sub> adsorption on Ni<sub>3</sub>N. Color code: Ni: grey; N: blue; H: white. Adsorption energy for H<sub>2</sub> adsorption: 0.06 eV.

**a**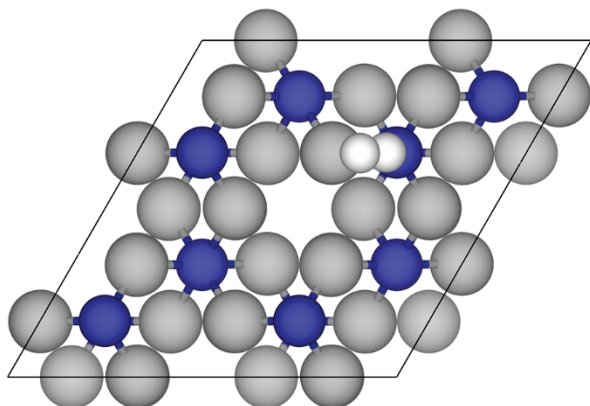**b**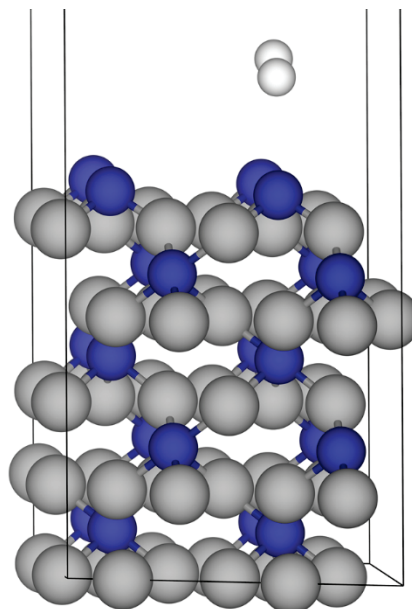

**Supplementary Fig. 60. H<sub>2</sub> adsorption structures.** **a** Top view and **b** side view of H<sub>2</sub> adsorption on Ni<sub>3</sub>N. Color code: Ni: grey; N: blue; H: white. Adsorption energy for H<sub>2</sub> adsorption: 0.05 eV.

**Supplementary Table 1.** The specific BET surface areas of Ni<sub>3</sub>N/Ni/NF and Pt/NF.

| Sample                           | Specific BET surface area of electrode <sup>a</sup> (m <sup>2</sup> g <sup>-1</sup> ) |
|----------------------------------|---------------------------------------------------------------------------------------|
| Ni <sub>3</sub> N/Ni/NF          | 1.61                                                                                  |
| Pt/NF (1.5 mg cm <sup>-2</sup> ) | 6.22                                                                                  |
| Pt/NF (2.5 mg cm <sup>-2</sup> ) | 4.47                                                                                  |

<sup>a</sup>The specific BET area is calculated on the basis of the total mass of Ni<sub>3</sub>N/Ni/NF or Pt/NF.

**Supplementary Table 2.** The geometric areas and electrochemically active surface areas (ECSAs) of Ni<sub>3</sub>N/Ni/NF and Pt/NF.

| Sample                           | Geometric area (cm <sup>2</sup> ) | ECSA (cm <sup>2</sup> ) |
|----------------------------------|-----------------------------------|-------------------------|
| Ni <sub>3</sub> N/Ni/NF          | 0.25                              | 247                     |
| Pt/NF (1.5 mg cm <sup>-2</sup> ) | 0.25                              | 450                     |
| Pt/NF (2.5 mg cm <sup>-2</sup> ) | 0.25                              | 680                     |

**Supplementary Table 3.** Comparison of the electrocatalytic performances of Ni<sub>3</sub>N/Ni/NF for the HER with those of reported electrocatalysts.

| Electrocatalyst                                                             | $\eta_{10}$<br>(mV) <sup>a</sup> | $\eta_{100}$<br>(mV) <sup>b</sup> | Electrolyte | Reference                                              |
|-----------------------------------------------------------------------------|----------------------------------|-----------------------------------|-------------|--------------------------------------------------------|
| Ni <sub>3</sub> N/Ni/NF                                                     | 19                               | 126                               | 1.0 M KPi   | <b>This work</b>                                       |
| Ni <sub>3</sub> N/Ni/NF                                                     | 12                               | 64                                | 1.0 M KOH   |                                                        |
| Ru@C <sub>2</sub> N                                                         | 17                               | N/A                               | 1.0 M KOH   | <i>Nat. Nanotech.</i> , <b>2017</b> , 12, 441          |
| Pt/C                                                                        | 20.7                             | N/A                               | 1.0 M KOH   |                                                        |
| Ru/C <sub>3</sub> N <sub>4</sub> /C                                         | 79                               | N/A                               | 0.1 M KOH   | <i>J. Am. Chem. Soc.</i> , <b>2016</b> , 138, 16174    |
| Ru@N-doped carbon                                                           | 100                              | N/A                               | 1.0 M PBS   | <i>Energy Environ. Sci.</i> , <b>2018</b> , 11, 800    |
|                                                                             | 32                               | N/A                               | 1.0 M KOH   |                                                        |
| RuP <sub>2</sub> @N,P-doped carbon                                          | 57                               | N/A                               | 1.0 M PBS   | <i>Angew. Chem. Int. Ed.</i> , <b>2017</b> , 56, 11559 |
|                                                                             | 52                               | N/A                               | 1.0 M KOH   |                                                        |
| Pt/C                                                                        | 57                               | N/A                               | 1.0 M PBS   |                                                        |
|                                                                             | 50                               | N/A                               | 1.0 M KOH   |                                                        |
| Cobalt-embedded N-rich carbon nanotubes                                     | 540                              | N/A                               | 0.1 M PBS   | <i>Angew. Chem. Int. Ed.</i> , <b>2014</b> , 53, 4372  |
|                                                                             | 370                              | N/A                               | 1.0 M KOH   |                                                        |
| MoNi <sub>4</sub> /MoO <sub>2</sub> @Ni foam                                | 15                               | ~39                               | 1.0 M KOH   | <i>Nat. Commun.</i> , <b>2017</b> , 8, 15437           |
| FeP nanoparticles                                                           | 102                              | N/A                               | 1.0 M PBS   | <i>ACS Nano</i> , <b>2014</b> , 8, 11101               |
| Pt on 2H-WS <sub>2</sub> nanosheets                                         | 50                               | N/A                               | 1.0 M KOH   | <i>Adv. Mater.</i> , <b>2018</b> , 30, 1704779         |
| Ni <sub>3</sub> S <sub>2</sub> /Ni foam                                     | 170                              | N/A                               | 1.0 M KPi   | <i>J. Am. Chem. Soc.</i> , <b>2015</b> , 137, 14023    |
|                                                                             | 223                              | N/A                               | 1.0 M KOH   |                                                        |
| NiS <sub>2</sub> /MoS <sub>2</sub> interface                                | 284                              | N/A                               | 0.1 M PBS   | <i>ACS Catal.</i> , <b>2017</b> , 7, 6179              |
|                                                                             | 204                              | N/A                               | 1.0 M KOH   |                                                        |
| Mn-doped CoP nanosheets Ti mesh                                             | 86                               | 250                               | 0.1 M PBS   | <i>ACS Catal.</i> , <b>2017</b> , 7, 98                |
|                                                                             | 76                               | 150                               | 1.0 M KOH   |                                                        |
| Ni <sub>2</sub> P embedded in N-doped carbon nanofibers                     | 185.3                            | ~380                              | 1.0 M PBS   | <i>Angew. Chem. Int. Ed.</i> , <b>2018</b> , 57, 1963  |
|                                                                             | 104.2                            | ~200                              | 1.0 M KOH   |                                                        |
| Ni <sub>0.89</sub> Co <sub>0.11</sub> Se <sub>2</sub> nanosheets on Ni foam | 82                               | ~310                              | 1.0 M PBS   | <i>Adv. Mater.</i> , <b>2017</b> , 29, 1606521         |
|                                                                             | 85                               | ~160                              | 1.0 M KOH   |                                                        |
| Ni-C-N nanosheets                                                           | 92.1                             | N/A                               | 1.0 M PBS   | <i>J. Am. Chem. Soc.</i> , <b>2016</b> , 138, 14546    |
|                                                                             | 30.8                             | ~110                              | 1.0 M KOH   |                                                        |
| Co-P film on Cu foil                                                        | 94                               | 158                               | 1.0 M KOH   | <i>Angew. Chem. Int. Ed.</i> , <b>2015</b> , 54, 6251  |
| CoP nanowires on carbon cloth                                               | 106                              | ~300                              | 1.0 M PBS   | <i>J. Am. Chem. Soc.</i> , <b>2014</b> , 136, 7587     |
|                                                                             | 209                              | ~520                              | 1.0 M KOH   |                                                        |
| MoS <sub>2+x</sub> on Ni foam                                               | 210                              | 335                               | 1.0 M KOH   | <i>Angew. Chem. Int. Ed.</i> , <b>2015</b> , 54, 664   |
| Ni <sub>5</sub> P <sub>4</sub> nanosheets on Ni foil                        | 150                              | N/A                               | 1.0 M KOH   | <i>Angew. Chem. Int. Ed.</i> , <b>2015</b> , 54, 12361 |
| NiSe/Ni foam                                                                | 96                               | N/A                               | 1.0 M KOH   | <i>Angew. Chem. Int. Ed.</i> ,                         |



|                                                            |      |      |           |                                                             |
|------------------------------------------------------------|------|------|-----------|-------------------------------------------------------------|
|                                                            |      |      |           | <b>2015</b> , 54, 9351                                      |
| Co-Ni-P nanowires on Ni foam                               | 52   | 137  | 1.0 M KOH | <i>J. Power Sources</i> , <b>2016</b> , 330, 156.           |
| CoP nanowires on Co foam                                   | 124  | 244  | 1.0 M KOH | <i>Chem. Sci.</i> , <b>2017</b> , 8, 2952                   |
| Co <sub>3</sub> Se <sub>4</sub> nanowires on Co foam       | 179  | 262  | 1.0 M KOH | <i>Adv. Energy Mater.</i> , <b>2017</b> , 7, 1602579        |
| N-modified Ni                                              | 64   | 203  | 1.0 M KPi | <i>J. Am. Chem. Soc.</i> , <b>2017</b> , 139, 12283         |
| Ni <sub>3</sub> N nanosheets/carbon microfibers            | 115  | N/A  | 1.0 M KOH | <i>J. Mater. Chem. A</i> , <b>2017</b> , 5, 9377            |
| Ni <sub>3</sub> N@Ni-Bi/Ti                                 | 265  | N/A  | 0.5 M KBi | <i>J. Mater. Chem. A</i> , <b>2017</b> , 5, 7806            |
| Ni <sub>3</sub> N-Ni(OH) <sub>2</sub> interface on Ti mesh | ~60  | 181  | 1.0 M KOH | <i>J. Mater. Chem. A</i> , <b>2018</b> , 6, 833             |
| Ni <sub>3</sub> N nanosheets on carbon cloth               | 112  | ~380 | 1.0 M PBS | <i>J. Mater. Chem. A</i> , <b>2016</b> , 4, 17363           |
|                                                            | 305  | ~470 | 1.0 M KOH |                                                             |
| TiN@Ni <sub>3</sub> N                                      | 21   | N/A  | 1.0 M KOH | <i>J. Mater. Chem. A</i> , <b>2016</b> , 4, 5713            |
| Ni <sub>3</sub> N/Ni(OH) <sub>2</sub> interface on Ni foam | 100  | 250  | 1.0 M KOH | <i>J. Mater. Chem. A</i> , <b>2015</b> , 3, 8171            |
| Ni <sub>3</sub> N nanosheets on carbon cloth               | 136  | ~350 | 1.0 M KOH | <i>Inorg. Chem. Front.</i> , <b>2017</b> , 4, 1120          |
| Ni <sub>3</sub> N on Ni foam                               | 121  | 254  | 1.0 M KOH | <i>Electrochim. Acta</i> , <b>2016</b> , 191, 841           |
| Pt-decorated Ni <sub>3</sub> N nanosheets                  | 50   | 120  | 1.0 M KOH | <i>Adv. Energy Mater.</i> , <b>2017</b> , 7, 1601390        |
| NiMoN/Ni <sub>3</sub> N nanosheets on carbon cloth         | 31   | 200  | 1.0 M KOH | <i>Nano Energy</i> , <b>2018</b> , 44, 353                  |
| Ni <sub>3</sub> N/Ni foam                                  | ~100 | 150  | 1.0 M KOH | <i>Adv. Energy Mater.</i> , <b>2017</b> , 7, 1601735        |
| Ni <sub>3</sub> N-Co                                       | 194  | ~290 | 1.0 M KOH | <i>Adv. Mater.</i> , <b>2018</b> , 30, 1705516              |
| Ni <sub>3</sub> FeN/reduced graphene oxide                 | 94   | ~210 | 1.0 M KOH | <i>ACS Nano</i> , <b>2018</b> , 12, 245                     |
| Fe <sub>2</sub> Ni <sub>2</sub> N                          | 180  | ~280 | 1.0 M KOH | <i>Inorg. Chem. Front.</i> , <b>2016</b> , 3, 630           |
| Ni <sub>3</sub> FeN/carbon cloth                           | 105  | ~450 | 1.0 M KOH | <i>ACS Appl. Mater. Interfaces</i> , <b>2018</b> , 10, 3699 |

<sup>a</sup> The overpotential required to deliver -10 mA cm<sup>-2</sup>. <sup>b</sup> The overpotential required to deliver -100 mA cm<sup>-2</sup>. The current density is calculated on the basis of the geometric electrode area.

**Supplementary Table 4.** ZPE values, adsorption energies and free energies for H adsorption.

|                             | frequencies /meV | $\Delta E$ /eV | $\Delta G$ /eV |
|-----------------------------|------------------|----------------|----------------|
| Ni                          | 138              | -0.54          | -0.30          |
|                             | 106              |                |                |
|                             | 103              |                |                |
| Ni_2                        | 139              | -0.53          | -0.29          |
|                             | 105              |                |                |
|                             | 101              |                |                |
| Ni <sub>3</sub> N_N         | 408              | -0.93          | -0.57          |
|                             | 92               |                |                |
|                             | 87               |                |                |
| Ni <sub>3</sub> N_hollow    | 130              | -0.25          | 0.01           |
|                             | 128              |                |                |
|                             | 116              |                |                |
| Ni <sub>3</sub> N/Ni_N      | 397              | -0.36          | 0.01           |
|                             | 106              |                |                |
|                             | 102              |                |                |
| Ni <sub>3</sub> N/Ni_hollow | 129              | -0.29          | -0.07          |
|                             | 92               |                |                |
|                             | 79               |                |                |
| Ni <sub>3</sub> N/Ni_N_2    | 391              | -0.09          | 0.26           |
|                             | 90               |                |                |
|                             | 78               |                |                |

## Supplementary Methods

### Chemicals

All chemicals were used as received without any further purification. Ammonium chloride ( $\text{NH}_4\text{Cl}$ ), nickel chloride ( $\text{NiCl}_2 \cdot 6\text{H}_2\text{O}$ ), potassium hydroxide (KOH), potassium phosphate dibasic ( $\text{K}_2\text{HPO}_4$ ), potassium phosphate monobasic ( $\text{KH}_2\text{PO}_4$ ) and potassium hexafluorophosphate ( $\text{KPF}_6$ ) were purchased from Fisher Chemical. Nickel foam (NF, > 99.99%, 80–110 pores per inch) was purchased from MTI. Sulfuric acid ( $\text{H}_2\text{SO}_4$ ), hydrochloric acid (HCl) and anhydrous acetonitrile ( $\text{CH}_3\text{CN}$ ) were purchased from Pharmco. Commercial Pt/C (20 wt%) was purchased from Fuel Cell Store.  $\text{NH}_3$  gas was obtained from Praxair. Water deionized (18  $\text{M}\Omega \cdot \text{cm}$ ) with a Barnstead E-Pure system was used in all experiments.

### Characterization

Scanning electron microscopy (SEM) measurement and elemental mapping analysis were conducted on a FEI Quanta 650 FEG microscope equipped with an INCA 350 spectrometer (Oxford Instruments) for energy dispersive X-ray (EDX) spectroscopy. Transmission electron microscopy (TEM) measurement was carried out on a JEM-2800 (JEOL, Japan). X-ray diffraction (XRD) patterns were obtained on a Rigaku MiniflexII Desktop X-ray diffractometer. The generated  $\text{H}_2$  during electrolysis was detected with a SRI gas chromatograph system 8610C equipped with a HayesSep D packed column, a molecular sieve 13  $\times$  packed column, and a thermal conductivity detector. The oven temperature was maintained at 80 °C and argon was used as the carrier gas. The X-ray photoelectron spectroscopy (XPS) analyses were performed using a Kratos Axis Ultra instrument (Chestnut Ridge) at the Surface Analysis Laboratory of Nanofab at the University of Utah. The surface area measurements were performed with  $\text{N}_2$  adsorption/desorption isotherms at liquid nitrogen temperature (77 K) using automated gas sorption analyzer (Quantachrome Instruments) after dehydration under vacuum at 423 K for 12 h

### Syntheses of electrocatalysts

Synthesis of Ni/carbon foam (Ni/CF) and  $\text{Ni}_3\text{N}/\text{Ni}/\text{carbon foam}$  ( $\text{Ni}_3\text{N}/\text{Ni}/\text{CF}$ ): The  $\text{Ni}_3\text{N}/\text{Ni}/\text{CF}$  electrodes were prepared by cathodic electrodeposition of Ni particles on carbon foams followed by thermal nitridation. The electrodeposition was carried out with a two-electrode configuration in a cell containing 2.0 M  $\text{NH}_4\text{Cl}$  and 0.1 M  $\text{NiCl}_2$  at room temperature. A piece of clean carbon foam (0.5 cm  $\times$  0.5 cm) and a carbon rod were used as the working and counter electrodes, respectively. The electrodeposition was performed at a constant current density of  $-1.0 \text{ A cm}^{-2}$  for 500 s under  $\text{N}_2$  protection without stirring to obtain Ni/CF. Then the resultant Ni/CF was placed in the center of a quartz tube purged with  $\text{NH}_3$  flow. It was heated to 300 °C at a ramping rate of 10 °C  $\text{min}^{-1}$  and maintained at the same temperature for 6 h. Finally, the furnace was naturally cooled down to room temperature, leading to  $\text{Ni}_3\text{N}/\text{Ni}/\text{CF}$ . The  $\text{NH}_3$  flow was kept throughout the whole process.

Synthesis of  $\text{Ni}_3\text{N}/\text{nickel foam}$  ( $\text{Ni}_3\text{N}/\text{NF}$ ): A piece of clean nickel foam (0.5 cm  $\times$  0.5 cm) was directly placed in the center of a quartz tube purged with  $\text{NH}_3$  flow. It was heated to 300 °C at a ramping rate of 10 °C  $\text{min}^{-1}$  and maintained at the same temperature for 6 h. Finally, the furnace was naturally cooled down to room temperature, leading to  $\text{Ni}_3\text{N}/\text{CF}$ . The  $\text{NH}_3$  flow was kept throughout the whole process.

### Electrochemically active surface areas measurement

The electrochemically active surface areas (ECSA) of these electrodes were determined according to an established methodology reported in the literature (*J. Am. Chem. Soc.* **2018**, 140, 2397). In order to avoid the ion transfer reactions at the electrode interface, non-aqueous electrochemical double layer capacitance measurements were conducted using a pseudo-reference electrode consisting of Ag/AgCl wire bathed in 0.15 M KPF<sub>6</sub>/CH<sub>3</sub>CN solution and separated from solution by a Vycor frit. Specifically, cyclic voltammetry curves of the electrodes were collected over a narrow range ( $\pm 50$  mV) centered around the open circuit potential (OCP) in 0.15 M KPF<sub>6</sub> with CH<sub>3</sub>CN electrolyte. CV cycling was repeated using a range of scan rates from 4 to 20 mV s<sup>-1</sup>. The electrochemical double-layer capacitance ( $C_{dl}$ ) was then estimated by plotting the difference between the anodic and cathodic current densities ( $\Delta j = j_a - j_c$ ) at OCP against the scan rate. The resulting linear slope is twice of the  $C_{dl}$ . The ECSA can be calculated according to the following equation:  $ECSA = C_{dl} / C_s$ , where  $C_s$  is the specific capacitance of a flat smooth surface of the electrode material, which is assumed to be 11  $\mu\text{F cm}^{-2}$  according to the literature report (*J. Am. Chem. Soc.* **2018**, 140, 2397)

### Free energy calculations

The Gibbs free energies were obtained by including zero-point energy (ZPE) and entropy corrections.

$$\Delta G = \Delta E + (\text{ZPE} - T\Delta S) \quad (1)$$

The ZPE were calculated by summing over vibrational modes from frequency calculations.

$$\text{ZPE} = \sum_i^{\text{modes}} \frac{1}{2} h\nu_i \quad (2)$$

TS for H<sub>2</sub> gas at 298 K is equal to -0.202 eV. [NIST Chemistry WebBook, <https://webbook.nist.gov/cgi/cbook.cgi?ID=C1333740&Mask=1>] The TS for adsorbed species is set to zero.
